# Supplementary material
Source: publisher figshare collection journal article supplement (https://gsapubs.figshare.com/ndownloader/files/31710350)
Supplement: Supplementary file 1 [file 31710350]

Hughes, A., Rood, D.H., DeVecchio, D.E., Whittaker, A.C., Bell, R.E., Wilcken, K.M., Corbett, L.B., Bierman, P.R., Swanson, B.J., and Rockwell, T.K., 2021, Tectonic controls on Quaternary landscape evolution in the Ventura basin, southern California, USA, quantified using cosmogenic isotopes and topographic analyses: GSA Bulletin, <https://doi.org/10.1130/B36076.1>.

## Supplemental Material

**Figure S1.** Balanced cross sections through the Long Canyon syncline taken from Huftile and Yeats (1996). The dip-slip offsets, which are included in Table 1, were calculated in Huftile and Yeats (1996) by retro-deforming these balanced cross sections. (A) Present day. (B) Retro-deformed to the top of the exposed Saugus Formation. (C) Retro-deformed to the base of the Las Posas Formation. Ages in boxes refer to the isochron burial ages for the appropriate horizon and the age in brackets below refers to the age interpretation for the same horizon in Huftile and Yeats (1996). Line of section is included on Figure 1.

**Figure S2.** Log-gradient as a function of log-drainage area for the study area. The plot on the left is for all streams with upstream drainage area  $>50,000 \text{ m}^2$ , which indicates a threshold drainage area of  $10^6 \text{ m}^2$ . However, using a threshold drainage area of  $10^6 \text{ m}^2$  results in stream heads that are not consistent with stream heads visible in the  $10 \text{ m}^2$  digital elevation model. The plot on the right is for all stream segments shown in figure 8A with drainage area  $>0.5 \times 10^6 \text{ m}^2$ . The slope of  $0.48 \pm 0.0004$  (error is one standard error) in the plot on the right is used to justify our reference concavity of 0.50.

**Figure S3.** A plot of  $^{26}\text{Al}$ - $^{10}\text{Be}$  concentrations (gray circles) for the burial dating samples collected from the top of the exposed Saugus Formation in the hanging wall of the Southern San Cayetano fault. Error bars are  $1\sigma$ . Several of the samples are indistinguishable from the surface production ratio (dashed black line), which indicates that these samples may be too young for  $^{26}\text{Al}/^{10}\text{Be}$  isochron burial dating.

**Figure S4.** (A) Geological map showing the location of isochron burial dating samples (stars) in the eastern Ventura basin. Mapped geological units are from Campbell et al. (2014). The colored circles represent the locations of paleomagnetic samples, which along with the location of the ash layer (dashed line with v's), are taken from Levi and Yeats (1993). Map location is shown on Figure 1. (B) Interpretation of the magnetic samples from Levi and Yeats (1993) based on the correlation of the ash layer in the Saugus Formation with the 0.76 Ma Bishop Ash.

**Figure S5.** Landslides in the hanging wall of the eastern section of the San Cayetano fault triggered by the 1994 M 6.7 Northridge earthquake. Landslides originally mapped by Harp and Jibson (1995) and recently amended by Townsend et al. (2020). Northridge earthquake landslides cover 2% of the surface area of catchment 9 and 5% of the surface area of catchment 10. Grid coordinates are in Universal Transverse Mercator (zone 11S).

**Figure S6.** Photos showing large boulders in Sisar Creek (catchment 5). Boulders occasionally in excess of 2 m tall may armor the channel, decrease channel incision, and, therefore, decrease erosion rates measured from channel sands. Photo locations: (A) Lat:  $34^\circ 27' 16.662'' \text{ N}$ , Lon:  $119^\circ 8' 2.93'' \text{ W}$ ; (B) Lat:  $34^\circ 27' 44.502'' \text{ N}$ , Lon:  $119^\circ 7' 49.94'' \text{ W}$ ; (C) Lat:  $34^\circ 27' 16.62'' \text{ N}$ , Lon:  $119^\circ 8' 2.88'' \text{ W}$ ; (D) Lat:  $34^\circ 27' 52.482'' \text{ N}$ , Lon:  $119^\circ 7' 48.99'' \text{ W}$ . Photos provided by Brian Swanson.

**Table S1.** Sensitivity analysis addressing the incorporation of uncertainty in the  $^{26}\text{Al}/^{10}\text{Be}$  surface production ratio into the burial ages

**Table S2.** Full sample parameters for isochron burial dating samples

**Table S3.** Sample parameters for the surface exposure dating samples from the Bear Canyon surface

**Table S4.** Parameters for  $^{10}\text{Be}$  erosion rate samples and inputs to CRONUS calculator

**Table S5.** Well data for wells used in cross section in Figure 6B

**Table S6.** Alternative isochron burial ages

**Table S7.** Details on process blanks for  $^{10}\text{Be}$  analysis

**Table S8.** Details on process blanks for  $^{26}\text{Al}$  analysis

**Table S9.**  $^{10}\text{Be}$  details for CRONUS-N samples

**Table S10.**  $^{26}\text{Al}$  details for CRONUS-N samples

# 1. COSMOGENIC NUCLIDE MEASUREMENT TECHNIQUES: BACKGROUND, SAMPLING METHODS, AND DATA REDUCTION

This study incorporates  $^{26}\text{Al}$ – $^{10}\text{Be}$  isochron burial dating, cosmogenic  $^{10}\text{Be}$ -derived erosion rates, and  $^{10}\text{Be}$  surface exposure dating. All three techniques are based on the same basic physics where rocks and soils near the Earth's surface accumulate terrestrial cosmogenic nuclides (TCN) primarily by nuclear spallation reactions via the interaction of cosmic rays from space with minerals contained in rocks or soils (Lal, 1991; Lal and Peters, 1967). In this study, we focus on the nuclides  $^{10}\text{Be}$  and  $^{26}\text{Al}$ , which are formed by the interaction of cosmic ray-derived secondary particles with O and Si in quartz (Lal, 1988). The penetration of cosmogenic ray-derived secondary neutrons, and the production rate of spallation-induced cosmogenic nuclides, decreases exponentially with depth to ~2–3 m below the surface (depending on material density). Therefore, the concentration of cosmogenic nuclides in a sample should reflect the time the sample has spent within the zone of nuclide production. Using this basic theory, different sampling strategies and methods of data reduction can be applied to calculate burial ages, exposure ages, or to quantify rates of erosion.

## 1.1 Isochron burial dating on the Saugus Formation: background

Isochron burial dating is a key tool for dating Quaternary sediments and can be applied to a wide range of terrestrial and marine deposits (e.g., Balco and Rovey, 2008; Balco et al., 2013; Bender et al., 2016; Çiner et al., 2015; Erlanger et al., 2012). Once a deposit is buried below the penetration depth of cosmic rays, cosmogenic nuclide production will cease and the nuclide concentration becomes primarily a function of radioactive decay, which occurs at a rate dependent on the radioactive half-life of the specific cosmogenic nuclide. The currently-accepted value for the half-life of  $^{10}\text{Be}$  is measured at  $1.387 \pm 0.012 \times 10^6 \text{ yr}^{-1}$  (Chmeleff et al., 2010) and for  $^{26}\text{Al}$  the half-life is  $0.708 \pm 0.017 \times 10^6 \text{ yr}^{-1}$  (Nishiizumi, 2004). The respective half-lives of  $^{10}\text{Be}$  and  $^{26}\text{Al}$  define an ideal age range for cosmogenic isotope isochron burial dating between ~0.2–5 Ma, although this range is dependent upon initial nuclide concentrations within the samples prior to deposition. The Saugus Formation is an ideal target for isochron burial dating because the estimated age is between 0.2 and 2.3 Ma (Levi and Yeats, 1993; Wehmiller et al., 1978). Additionally, the provenance for much of the Saugus Formation is the San Gabriel Mountains or the Topatopa Mountains (Fig. 1) (Levi and Yeats, 1993; Heirshberg, 1997), which is composed of igneous and metamorphic rocks or Tertiary sandstones, respectively. These source rocks provide abundant quartz required for the measurement of  $^{10}\text{Be}$  and  $^{26}\text{Al}$  (Campbell et al., 2014).

Simple burial dating assumes minimal post-burial production has affected a single sample, which limits the application to very specific settings such as cave deposits (Granger and Muzikar, 2001). The advantage of the isochron burial dating method is that a suite of multiple samples with the same burial age, but varying pre-depositional exposure and erosion histories, can be analyzed simultaneously (Balco and Rovey, 2008). Several assumptions are required to use isochron burial dating. Firstly, the period of exposure during transport and prior to deposition in the current deposit should be short enough that no significant radioactive decay occurred during transportation. The ~3600 m thick succession of Saugus Formation sediments within the central Ventura basin, all of which are thought to be Pleistocene in age, suggests high sedimentation rates and associated rapid erosion rates (Yeats, 1988). High sedimentation rates

suggest that the Saugus Formation was transported and deposited rapidly, and that minimal decay will have occurred prior to deposition.

A second assumption is that all clasts should share the same post-burial history and, therefore, post-burial nuclide production can be treated as a constant among a suite of samples. To address this, samples for burial dating of the Saugus Formation were collected from the same depth horizon (within  $\pm 30$  cm). Sampling from the same depth horizon also increases the chances that, although all clasts likely have different prior depositional and erosional histories, they should all share the same post-burial history. Additionally, samples must have been rapidly buried to a depth below the cosmogenic nuclide production zone to ensure that post-burial production by neutron spallation does not overprint the signal of post-burial decay. We sampled from a depth of  $> 2$  m from the surface to increase the probability that post-burial production by neutron spallation does not overprint the decay signal (Balco and Rovey, 2008).

For each isochron, the goal was to collect around eight individual cobble-sized samples, an amalgamated sample of approximately fifty pebble-sized clasts, and a bulk sample ( $\sim 2$  kg) of sand. The aim of sampling this range of grain sizes is to capture a wide range of erosional processes which should increase the chance of sampling from clasts with a variety of nuclide concentrations to plot on an isochron. Unweathered quartz-rich cobbles and pebbles were selected to maximize the amount of target mineral for  $^{10}\text{Be}$  and  $^{26}\text{Al}$  analyses, and samples were collected from within the same stratigraphic unit to ensure a similar shared burial history across the individual samples at a specific sampling location.

Isochrons and associated ages were plotted using a Bayesian linear regression approach (Bender et al., 2016). The Bayesian approach resolves a correlation between slope and intercept for numerous different regressions within a predefined set of errors in x-y data (i.e.,  $^{10}\text{Be}$ - $^{26}\text{Al}$  concentration space). For burial dating isochrons, the maximum slope of the regression is set at 6.75, to be consistent with the standard surface production ratio of  $^{26}\text{Al}/^{10}\text{Be}$  of 6.75 (Balco and Rovey, 2008). The minimum slope is zero. The likelihood of each regression of slope and intercept is recorded in normalized probability histograms, which also illustrate whether the set of regressions represents a Gaussian distribution. The calculations were performed with a Matlab script that runs Monte Carlo simulations to conduct 1,000,000 trial runs to calculate slope and intercept values from  $^{10}\text{Be}$  and  $^{26}\text{Al}$  concentrations and associated  $1\sigma$  measurement errors (Bender et al., 2016). The Matlab script also calculates the likelihood of each slope and intercept value, assuming a Gaussian distribution (Bender et al., 2016). Output values for most likely estimate of slope (the modal value) are input into Equation 1 of the main manuscript to calculate the burial age. Uncertainties are plotted by inputting 95% confidence values into Equation 1 from the main manuscript.

## 1.2 Isochron burial sample locations

We sampled the base of the Las Posas Formation in the hanging wall of the Ventura fault from a bed of pebbles and cobbles in a road cut exposure in Hall Canyon, immediately above what we identified in the field as the transition from the Las Posas Formation to the underlying Mudpit Claystone member of the Pico Formation. However, the contact is gradational so the samples may be located several meters above or below the mapped contact. Samples to date the top of the exposed Saugus Formation at Ventura were located  $\sim 50$  m below the top of the mapped extent of the Saugus Formation in a track-cut exposure located just behind Ventura City Hall, on the south limb of the Ventura Avenue Anticline (Dibblee and Ehrenspeck., 1988).

We collected samples to date the Grimes Canyon deltaic facies, which underlies the Saugus and Las Posas Formations in the hanging wall of the Oak Ridge fault (Fig. 2), from a road cut exposure along State Route 23 where the Grimes Canyon deltaic facies interfingers with Pico Formation ~50 m up section from the base of the Grimes Canyon deltaic facies (Figs. 2 and 6; Campbell et al., 2014). We obtained samples to date the top of the exposed Saugus Formation in the hanging wall of the Oak Ridge fault from the axis of the Long Canyon syncline (Fig. 6). We collected the Long Canyon syncline samples from a stream-cut exposure located as close as possible to what is mapped as the core of the syncline (Fig. 6B). The goal was to sample the youngest preserved sediments that, in theory, should be preserved in the core of the syncline. Samples from the core of the Happy Camp syncline were collected from a track-cut exposure located within sediments mapped as either the terrestrial Saugus Formation (Dibblee and Ehrenspeck, 1992) or tentatively within the Grimes Canyon deltaic facies (Campbell et al., 2014).

In the eastern Ventura basin, we collected samples to date the top of the exposed Saugus Formation at the mapped location of the contact between the Saugus Formation and overlying upper Saugus Formation (Fig. S4; Campbell et al., 2014). We obtained samples to date the base of the brackish water Sunshine Ranch member of the Saugus Formation from a channelized pebble and cobble horizon within a large road-cut exposure at the end of the south bound off-ramp from the I-5 freeway to Calgrove Boulevard. The sample was located ~10 m stratigraphically above the contact with marine sediments mapped as part of the upper Pico Formation (Figure S4; Campbell et al., 2014). We note, however, that field observations indicate that deposits at the sample location more closely resemble terrestrial Saugus deposits rather than shallow marine or brackish deposits.

### **1.3 Exposure dating using boulder sampling; background, sampling strategy, and data reduction**

Terrestrial cosmogenic nuclide (TCN) exposure dating for surface clasts, including boulders, is a well-established technique for dating various Pleistocene sedimentary landforms such as glacial surfaces (e.g., Rood et al., 2011; Wesnousky et al., 2016) or alluvial fans (e.g., Behr et al., 2010; Frankel et al., 2007; Owen et al., 2014). Post-depositional exhumation of a clast from the subsurface by the erosion of surrounding material can affect the measured nuclide concentration within a boulder and, consequently, the apparent age. Specifically, if a boulder has been exhumed, then the production rate will have varied through time as the amount of shielding from the surrounding soils decreased. Consequently, an exhumed boulder will give an apparent age that will underestimate the true age for the deposit or surface (Behr et al., 2010; Heyman et al., 2016; Rood et al., 2011). Significant erosion of the outer surface of a boulder can reduce measured nuclide concentrations relative to if the boulder was uneroded and will also result in apparent exposure ages that underestimate the exposure age (DeVecchio et al., 2012b; Rood et al., 2011). In contrast, a large inherited nuclide concentration can artificially increase the apparent exposure age of the boulder surface.

We sampled the upper 2–5 cm of the tops of each boulder and from the center of flat topped boulders to reduce the effects of fire spallation (Bierman and Gillespie, 1991) and uncertainties relating to surface geometry (Nishiizumi et al., 1989). Where possible, care was taken to avoid sampling anomalously fresh, unweathered boulder surfaces, which may indicate recent breakage of the boulder. We also selected boulders with case-hardening, polishing, and

low surface relief because these characteristics indicate that the boulder has undergone minimal erosion of the outer surface. The latitude, longitude, and elevation of each boulder was measured using a handheld GPS and topographic shielding was measured at each boulder using a clinometer and compass.

$^{10}\text{Be}$  exposure ages were calculated using version 3.0 of the CRONUS-Earth online exposure age calculator (Balco et al., 2008). Topographic shielding corrections were made using the CRONUS-Earth online geometric shielding calculator, version 2 (available at: [http://stoneage.ice-d.org/math/skyline/skyline\\_in.html](http://stoneage.ice-d.org/math/skyline/skyline_in.html)). We employed a reference production rate for  $^{10}\text{Be}$  of  $4.22 \pm 0.16$  atoms  $\text{g}^{-1}$  based on the Promontory Point (PPT) reference production rate calibration data from Lake Bonneville, Utah, USA (Lifton et al., 2015) and used the production rate scaling scheme of Lal (1991) and Stone (2000).

The exposure age for the uplifted Bear Canyon alluvial fan surface is based on the average exposure age for the three oldest boulders assuming that the remaining seven samples have been exhumed by erosion of alluvial fan surface material surrounding the boulders since their time of deposition (Fig. 7). If boulders are exhumed after deposition, then all nuclides that would have accumulated at the surface from the time of deposition to the time of exhumation are not necessarily accounted for, and measured  $^{10}\text{Be}$  concentration will be lower than the  $^{10}\text{Be}$  concentration that reflects the true exposure age of the surface (Behr et al., 2010; Heyman et al., 2016). Therefore, our preferred exposure age of  $121.2 \pm 11.6$  ka is based on the three oldest boulders and assumes that the boulders below 2.4 m height have been exhumed since initial deposition and the  $^{10}\text{Be}$  concentration in the boulders below 2.4 m height does not reflect the true exposure age of the surface.

#### **1.4 $^{10}\text{Be}$ catchment-averaged erosion rates; background and sampling**

Bedrock in an actively eroding landscape accumulates cosmogenic nuclides (including  $^{10}\text{Be}$ ) as it passes upwards through the production zone of cosmogenic nuclides before being weathered and eroded from the hillslope as regolith, transported, and deposited as sediment in an active channel. In eroding landscapes, where both nuclide production during transportation and radioactive decay can be ignored and sediment is well mixed, the concentration of  $^{10}\text{Be}$  within a sand sample from an active fluvial channel is proportional to the catchment-averaged  $^{10}\text{Be}$  production rate and is inversely proportional to the spatially averaged erosion rate (Bierman and Steig, 1996; Granger et al., 1996; Lal, 1991). Consequently, rapidly eroding catchments will have low nuclide concentrations and slowly eroding catchments will have high nuclide concentrations.

The relationship between nuclide concentration and spatially-averaged erosion rates depends upon an approximately uniform and evenly distributed upstream percentage of quartz to ensure that the supply of quartz to the catchment is evenly sourced (Bierman and Steig, 1996). Variations in grain sizes are observed within individual catchments within the Ventura basin but not significant changes in lithology, such as changes from sedimentary rocks to igneous or metamorphic rocks (Fig. 2). Accordingly, we assume that quartz is sourced evenly from throughout the catchments in the study area and that the sediment is well-mixed and homogenized during transport.

An additional assumption when deriving catchment-averaged erosion rates is that catchments are in isotopic equilibrium where the incoming and outgoing isotope (or sediment) fluxes are equal (Bierman and Steig, 1996). Perturbations in the ratio of incoming and outgoing

isotope flux can arise in areas with high-density, deep-seated landslides that mobilize nuclide-depleted sediments from beneath the nuclide production zone (Niemi et al., 2005; Roda-Boluda et al., 2019; Yanites et al., 2009). The influence of landslides on the catchment-averaged erosion rates is discussed in detail in the main manuscript.

We collected 18 samples of ~2 kg of sand-sized sediment using a trowel and we recorded the latitude, longitude, and elevation at the sample location using a handheld GPS. Where possible, we sampled from sand bars indicating recent fluvial transport and located as near as possible to the center of the channel to avoid contamination of the sample from bank collapse or landslides.

## **2. LABORATORY ANALYSIS AND ACCELERATOR MASS SPECTROMETRY DETAILS**

### **2.1 Laboratory analysis**

Beryllium and aluminum isolation followed the methodology of Corbett et al. (2016). Firstly, an in house  $^9\text{Be}$  carrier spike produced from beryl was added to the samples. For burial dating samples, a commercial SPEX aluminum ICP standard solution was also added to the samples as carrier. For samples processed at the University of Vermont (UVM), ten samples were processed alongside a blank to account for laboratory background contamination and a sample of the CRONUS-N sand (Jull et al., 2015) to assess inter-laboratory reproducibility in results (Tables S9 and S10). Our analyses of CRONUS-N have an average concentration of  $2.31 \times 10^5 \pm 1.78 \times 10^4$  ( $N = 7$ ;  $1\sigma$ )  $^{10}\text{Be}$  atoms  $\text{g}^{-1}$  and  $1.03 \times 10^6 \pm 6.53 \times 10^4$  ( $N = 6$ ;  $1\sigma$ )  $^{26}\text{Al}$  atoms  $\text{g}^{-1}$ , which are consistent with the standard values of  $2.17 \times 10^5 \pm 0.88 \times 10^4$   $^{10}\text{Be}$  atoms  $\text{g}^{-1}$  and  $1.05 \times 10^6 \pm 1.06 \times 10^5$   $^{26}\text{Al}$  atoms  $\text{g}^{-1}$  (Tables 4a and 4b, respectively, of Jull et al., 2015). Samples processed in the CosmIC laboratory at Imperial College London (ICL) were processed in batches of nine alongside one process blank. Prior to dissolution and elemental separation, quartz aliquots were tested for purity using an inductively coupled plasma-optical emission spectrometer (ICP-OES). Pure quartz was dissolved in concentrated HF and  $\text{HNO}_3$  before being converted into chloride form by fuming in  $\text{HClO}_4$ , and then diluted in HCl. Be and, if appropriate, Al were isolated in the samples using ion exchange chromatography. Anion exchange with HCl was first employed to remove Fe from the samples. Then cation exchange, firstly with  $\text{H}_2\text{SO}_4$  and secondly with HCl, was used to isolate Be and Al. Be and Al in solution was precipitated as a beryllium or aluminum hydroxide gel which was either burnt using a Bunsen burner or heated in a muffle furnace to produce beryllium or aluminum oxide. Be as beryllium oxide was mixed with Nb powder, and Al as aluminum oxide was mixed with Ag powder. The mixtures were then transferred into copper cathodes ready for analysis using accelerator mass spectrometry.

### **2.2 Accelerator mass spectrometry details**

Accelerator mass spectrometry (AMS) analysis for sample suites HCR, SLC, OCS, SI5 and BCB took place at the Centre for Accelerator Science at the Australian Nuclear Science and Technology Organization (ANSTO) (Wilcken et al., 2017, 2019). Be standard 01–5–2 with an assumed  $^{10}\text{Be}/^9\text{Be}$  ratio of  $8.558 \times 10^{-12}$  (Nishiizumi et al., 2007) was used to calibrate  $^{10}\text{Be}/^9\text{Be}$  ratios measured in the samples. Measured  $^{26}\text{Al}/^{27}\text{Al}$  ratios for the burial dating samples (HCR,

SLC, OCS, SI5) were calibrated against Al standard KN 01–4–2 with a nominal  $^{26}\text{Al}/^{27}\text{Al}$  ratio of  $3.096 \times 10^{-11}$  (Nishiizumi, 2004). For sample suites HCR, SLC, OCS, and BCB, during  $^{10}\text{Be}/^9\text{Be}$  AMS measurements,  $\text{BeO}^-$  ion beam currents were 1.2–8.0  $\mu\text{A}$  for the samples and 2.9–9.7  $\mu\text{A}$  for the standards. The average  $\text{BeO}^-$  ion beam current for the samples was 59% of the average beam current for the primary standard. The range of  $1\sigma$  analytical uncertainties for  $^{10}\text{Be}/^9\text{Be}$  AMS measurements for the samples was 3–12% and boron corrections were <1%. During  $^{26}\text{Al}/^{27}\text{Al}$  AMS measurements for samples HCR, SLC, OCS,  $\text{Al}^-$  ion beam currents were 0.2–0.6  $\mu\text{A}$  for the samples and 0.3–0.7  $\mu\text{A}$  for the standards. The average  $\text{Al}^-$  ion beam current for the samples was 77% of the average beam current for the primary standard. The  $1\sigma$  analytical uncertainties for the  $^{26}\text{Al}/^{27}\text{Al}$  AMS measurements ranged from 4–29%.

Sample suites SLC and OCS were blank corrected for Be using the average of three associated process blanks with measured  $^{10}\text{Be}/^9\text{Be}$  AMS ratios of  $5.56 \times 10^{-16}$ ,  $6.93 \times 10^{-16}$ , and  $5.87 \times 10^{-16}$  and an average ratio of  $6.12 \times 10^{-16} \pm 7.22 \times 10^{-17}$  ( $N = 3$ ,  $1\sigma$ ). Total  $^{10}\text{Be}$  atoms in each of the three blanks processed alongside these samples was  $9190 \pm 2200$  atoms,  $11180 \pm 2400$  atoms, and  $9150 \pm 2600$  atoms, and the average values used for the blank corrections was  $9970 \pm 1180$  atoms (derived from the average and standard deviation of the measured AMS ratios;  $N = 3$ ,  $1\sigma$ ). The overall range in final  $1\sigma$  analytical uncertainties for measurement of  $^{10}\text{Be}$  concentrations was 3–9%. Sample suites SLC and OCS were blank corrected for Al using the average of four associated process blanks with measured  $^{26}\text{Al}/^{27}\text{Al}$  AMS ratios of  $1.31 \times 10^{-15}$ ,  $9.74 \times 10^{-16}$ ,  $9.27 \times 10^{-16}$ , and  $1.13 \times 10^{-15}$  and an average ratio of  $1.13 \times 10^{-15} \pm 2.09 \times 10^{-16}$  ( $N = 4$ ,  $1\sigma$ ). Total  $^{26}\text{Al}$  atoms in each of the four blanks processed alongside these samples were  $76200 \pm 34100$  atoms,  $52948 \pm 37440$  atoms,  $50430 \pm 50440$  atoms, and  $72070 \pm 41620$  atoms, and the average value used for the blank correction was  $62720 \pm 11600$  atoms ( $N = 4$ ,  $1\sigma$ ). The overall range in final  $1\sigma$  analytical uncertainties for measurement of  $^{26}\text{Al}$  was 5–16%.

Sample suite HCR was blank corrected for Be using the blank processed alongside the samples in the laboratory with a measured  $^{10}\text{Be}/^9\text{Be}$  AMS ratio of  $5.87 \times 10^{-16}$ . The total  $^{10}\text{Be}$  atoms used for blank correction was  $9150 \pm 2600$  atoms. The overall range in final  $1\sigma$  analytical uncertainties for measurement of  $^{10}\text{Be}$  concentrations for sample HCR was 3–17%. Sample suite HCR was blank corrected for Al using the blank processed alongside the samples in the laboratory with a measured  $^{26}\text{Al}/^{27}\text{Al}$  AMS ratio of  $1.31 \times 10^{-15}$  and the total  $^{26}\text{Al}$  atoms in the blank was  $72070 \pm 41620$  atoms. The overall range in final  $1\sigma$  analytical uncertainties for measurement of  $^{26}\text{Al}$  for HCR was 4–44%.

Sample suite BCB (the boulder exposure age samples), was processed in two batches and blank corrected using the concentration of the specific blank processed alongside each batch. Measured  $^{10}\text{Be}/^9\text{Be}$  AMS ratios for the two process blanks were  $7.50 \times 10^{-16}$  and  $6.62 \times 10^{-16}$  and total  $^{10}\text{Be}$  atoms in the two blanks processed were  $12110 \pm 4030$  atoms and  $10700 \pm 3100$  atoms. The overall range in final  $1\sigma$  analytical uncertainties for  $^{10}\text{Be}$  measurements in sample suite BCB was 3–4%.

During  $^{10}\text{Be}/^9\text{Be}$  AMS measurements for sample suite SI5 at ANSTO,  $\text{BeO}^-$  ion beam currents were 3.8–5.4  $\mu\text{A}$  for the samples. For  $^{10}\text{Be}/^9\text{Be}$  AMS measurements of sample suite SI5, the range of  $1\sigma$  analytical uncertainties was 5–11% and boron corrections were <1%. During  $^{26}\text{Al}/^{27}\text{Al}$  AMS measurements for SI5,  $\text{Al}^-$  ion beam currents were 0.3–0.5  $\mu\text{A}$  for the samples and 0.4  $\mu\text{A}$  on average for the standards. The range of  $1\sigma$  analytical  $^{26}\text{Al}/^{27}\text{Al}$  AMS uncertainties for the samples was 16–27%. Sample suite SI5 was blank corrected for Be and Al using the concentration of the batch-specific process blank that was processed in the same batch as the



samples. The measured  $^{10}\text{Be}/^9\text{Be}$  AMS ratio for the Be blank was  $1.29 \times 10^{-15}$  and the total  $^{10}\text{Be}$  atoms in the blank was  $22490 \pm 2720$  atoms. The overall range in final  $1\sigma$  analytical uncertainties for  $^{10}\text{Be}$  measurements for SI5 was 6–20%. The measured  $^{26}\text{Al}/^{27}\text{Al}$  AMS ratio for the Al blank was  $1.21 \times 10^{-15}$  and the total  $^{26}\text{Al}$  atoms in the blank was  $72570 \pm 36290$  atoms. The overall range in final  $1\sigma$  analytical uncertainties for the measurement of  $^{26}\text{Al}$  for SI5 was 21–65%.

AMS analysis for Be and Al for sample suites SGR, SGC2, STL and Al for sample suites SVF and SCG took place at the Scottish Universities Environmental Research Centre (SUERC). Measured  $^{10}\text{Be}/^9\text{Be}$  ratios were calibrated using Be standard NIST with an assumed Be ratio of  $2.79 \times 10^{-11}$  (Nishiizumi et al., 2007) and  $^{26}\text{Al}$  analyses were normalized to the Z92-0222 standard with nominal  $^{26}\text{Al}/^{27}\text{Al}$  ratio of  $4.11 \times 10^{-11}$ , which is consistent with the values reported in Nishiizumi (2004). For sample suites SGC2, STL, and SGR the average  $\text{BeO}^-$  ion beam current for the samples was 54% of the average beam current for the primary standard and  $1\sigma$  analytical uncertainties for the  $^{10}\text{Be}/^9\text{Be}$  AMS measurements for the samples ranged from 3–10%. During  $^{26}\text{Al}/^{27}\text{Al}$  AMS measurements the average  $\text{Al}^-$  ion beam current for the samples was 69% of the average beam current for the primary standard. The range of  $1\sigma$  analytical uncertainties associated with  $^{26}\text{Al}/^{27}\text{Al}$  AMS measurements was 3–16%. Sample suites STL and SGR were blank corrected for Be using the average of two associated blanks processed alongside the samples with measured  $^{10}\text{Be}/^9\text{Be}$  AMS ratios of  $2.73 \times 10^{-15}$  and  $3.12 \times 10^{-15}$  and an average ratio of  $2.93 \times 10^{-15} \pm 2.78 \times 10^{-16}$  ( $N = 2$ ,  $1\sigma$ ). Total  $^{10}\text{Be}$  atoms in each of the two blanks processed alongside these samples was  $46366 \pm 7425$  atoms and  $40645 \pm 6075$  atoms, and the average value used for the blank correction was  $43510 \pm 4156$  atoms ( $N = 2$ ;  $1\sigma$ ). The final range in overall  $1\sigma$  analytical uncertainties for measurement of  $^{10}\text{Be}$  concentrations was 3–17%.

Sample suites STL and SGR were blank corrected for Al using the average of two associated process blanks with measured  $^{26}\text{Al}/^{27}\text{Al}$  AMS ratios of  $6.30 \times 10^{-16}$  and  $3.07 \times 10^{-16}$  and an average ratio of  $4.69 \times 10^{-16} \pm 2.29 \times 10^{-16}$  ( $N = 2$ ,  $1\sigma$ ). Total  $^{26}\text{Al}$  atoms in each of the two blanks processed alongside these samples was  $27755 \pm 19627$  atoms and  $13254 \pm 13253$  atoms and the average value used for the blank correction was  $20260 \pm 9900$  atoms. The overall range in final  $1\sigma$  analytical uncertainties for measurement of  $^{26}\text{Al}$  for sample suites STL and SGR was 3–15%. Sample suite SGC2 was blank corrected using the blank processed alongside the samples in the laboratory with a measured  $^{10}\text{Be}/^9\text{Be}$  AMS ratios of  $3.12 \times 10^{-15}$  and total  $^{10}\text{Be}$  of  $46366 \pm 7425$  atoms. The final range in overall  $1\sigma$  analytical uncertainties for measurement of  $^{10}\text{Be}$  concentrations was 3–32%. Sample suite SGC2 was blank corrected for Al using a process blank with a measured  $^{26}\text{Al}/^{27}\text{Al}$  AMS ratio of  $6.30 \times 10^{-16}$  and total  $^{26}\text{Al}$  of  $27755 \pm 19627$  atoms. The overall range in final  $1\sigma$  analytical uncertainties for measurement of  $^{26}\text{Al}$  for sample suites SGC2 was 6–19%.

AMS ratios for  $^{10}\text{Be}/^9\text{Be}$  for sample suites SVF and SCQ and for the erosion rate samples were measured in two separate AMS runs at Lawrence Livermore National Laboratory AMS facility (Rood et al., 2010) and were normalized using Be standard 01–5–4 with an assumed  $^{10}\text{Be}/^9\text{Be}$  ratio of  $2.851 \times 10^{-12}$  (Nishiizumi et al., 2007). For sample suites SVF and SCQ, the average  $\text{BeO}^-$  ion beam current for the samples was 68% of the average beam current for the primary standard. The range of  $1\sigma$  analytical uncertainties for  $^{10}\text{Be}/^9\text{Be}$  AMS measurements for the samples was 3–16%. During  $^{26}\text{Al}/^{27}\text{Al}$  AMS measurements the average  $\text{Al}^-$  ion beam current for the samples was 79% of the average beam current for the primary standard. The range of  $1\sigma$  analytical uncertainties associated with the  $^{26}\text{Al}/^{27}\text{Al}$  AMS measurements for the samples was 6–

17%. Sample suites SVF and SCQ were blank corrected for Be using the batch-specific process blank measured with the samples. For SVF and SCQ the measured  $^{10}\text{Be}/^9\text{Be}$  AMS ratio for the process blank was  $1.97 \times 10^{-15}$  and the total  $^{10}\text{Be}$  in the process blank was  $27114 \pm 3906$  atoms. The final range in overall  $1\sigma$  analytical uncertainties for measurement of  $^{10}\text{Be}$  concentrations was 2–25%. Sample suites SVF and SCQ were blank corrected for Al using the batch-specific process blank measured with the samples. For SVF and SCQ the measured  $^{26}\text{Al}/^{27}\text{Al}$  AMS ratio for the process blank was  $8.35 \times 10^{-16}$  and the total  $^{26}\text{Al}$  was  $36414 \pm 21018$  atoms. The overall range in total  $1\sigma$  analytical uncertainties for measurement of  $^{26}\text{Al}$  concentrations for these four samples was 7–20%.

During  $^{10}\text{Be}/^9\text{Be}$  AMS measurements for the erosion rate samples,  $^9\text{Be}^{3+}$  ion beam currents were 12–22  $\mu\text{A}$  for the samples. The  $1\sigma$  analytical uncertainties associated with  $^{10}\text{Be}/^9\text{Be}$  AMS measurements for the samples ranged from 2–22%. The erosion rate samples were blank corrected using the average of the two blanks processed alongside the samples in the laboratory. The two process blanks had measured  $^{10}\text{Be}/^9\text{Be}$  AMS ratios of  $1.82 \times 10^{-15}$  and  $1.83 \times 10^{-15}$  and the average value used for the correction was  $1.82 \times 10^{-15} \pm 8.67 \times 10^{-18}$  ( $N = 2$ ;  $1\sigma$ ). Total  $^{10}\text{Be}$  in each of these blanks was  $30933 \pm 4391$  atoms and  $31126 \pm 4227$  atoms, respectively, with an average value of  $31029 \pm 136$  atoms. The overall range in total  $1\sigma$  analytical uncertainties for measurement of  $^{10}\text{Be}$  concentrations was 2–19%.

### 3. STREAM POWER, $K_{\text{SN}}$ , AND FLUVIAL RESPONSE

On timescales of  $10^6$ – $10^7$  years, landscapes might be expected to reach a dynamic equilibrium where erosion and rock uplift rates become coupled, like the relationship documented in parts of the Himalaya (Lavé and Avouac, 2001; Finnegan et al., 2008) and the Basin and Range (Densmore et al., 2004). In both transient and steady-state landscapes, longitudinal stream profiles can be defined by a power law function that relates channel gradient,  $S$ , at a particular down-system point, to upstream drainage area,  $A$ . For a simple stream power model in a steady-state landscape this can be expressed as

$$S = \left(\frac{U}{K}\right)^{\frac{1}{n}} A^{-\frac{m}{n}} \text{ (Equation S1)}$$

where  $U$  is an uplift rate,  $K$  is a coefficient that represents bedrock erodibility (amongst other factors) and  $m$  and  $n$  are exponents related to erosional dynamics and hydraulic geometry (e.g.,

Whipple and Tucker, 1999; Tucker and Whipple, 2002). The term  $\left(\frac{U}{K}\right)^{\frac{1}{n}}$  can be described as the channel steepness index,  $k_s$ , and the ratio of  $m/n$  as the channel concavity,  $\theta$ . For a classic unit stream power model,  $m = 0.5$ ,  $n = 1$ , and  $\theta = 0.5$ . A reference value of  $\theta$  is typically used to estimate a normalized channel steepness index,  $k_{sn}$ , allowing comparisons in steepness between neighboring river channels with different concavities (e.g., Snyder et al., 2000; Wobus et al., 2006a). The steepness index fundamentally reflects how steep a river is for a given drainage area and has been shown in numerous studies to be sensitive to both uplift and bedrock erodibility (Kirby and Whipple, 2001; Kirby et al., 2003; Cyr et al., 2010; DiBiase et al., 2010; DiBiase and Whipple, 2011; D'Arcy and Whittaker, 2014).

To calculate a reference concavity, we used standard algorithms contained in TopoToolbox (Schwanghart and Scherler, 2014). We initially extracted a stream network with a high drainage density using a low-threshold stream area of  $50,000 \text{ m}^2$ . We then identified the transition from colluvial to fluvial domains based on the change in gradient on a plot of log-

drainage area versus log-gradient to be around  $10^6 \text{ m}^2$  (Figure S2). The slope of a linear regression through the data from drainage areas  $>10^6 \text{ m}^2$  has a slope of 0.45. However, using a minimum threshold area of  $10^6 \text{ m}^2$  results in many streams which underestimate the true stream length as visible in the USGS 10-m digital elevation models (DEM). A minimum threshold area of  $0.5 \times 10^6 \text{ m}^2$  returns stream lengths that show a better agreement with what we interpret to be the channel heads in the DEM. With a minimum threshold area of  $0.5 \times 10^6 \text{ m}^2$  for the stream's shown in Figure 8A, the slope of the regression of log-drainage area versus log-gradient is  $0.48 \pm 0.0004$  (errors are one standard error; Figure S2). We use this slope to justify a reference concavity of 0.50.

In order to calculate fluvial response times presented in section 5.3 of the main manuscript we first need to estimate the 'erodibility' parameter  $K$ . In a simplified stream power erosion law assuming topographic steady state (e.g., Howard and Kerby, 1983; Whipple and Tucker, 2002):

$$U = KA^m S^n, \quad (\text{Equation S2})$$

we can rearrange for  $K$ :

$$K = \frac{U}{A^m S^n} \quad (\text{Equation S3})$$

Values for the rock uplift rate ( $U$ ) are based on the values contained in Table 1 and upstream drainage area ( $A$ ) is based on the values in Table 2. We measured slope ( $S$ ) as the average gradient of the entire stream assuming that any knickpoint has propagated up the entire stream length and that any current knickpoints are non-tectonic. In our simplified calculations of  $K$ , we assume the classic case where the slope exponent ( $n$ ) is equal to 1 (Howard and Kerby, 1983; Whipple and Tucker, 1999) and extract the drainage area exponent,  $m$ , from the reference concavity ( $\theta$ ) of 0.5 with the formula:

$$\theta = \frac{m}{n} \quad (\text{Equation S4})$$

Uplift rates are spatially variable, so we calculated local  $K$  values based on the local uplift rate. We calculated local  $K$  values in the hanging wall of the Ventura fault based on the uplift rates of the Ventura Avenue anticline (Rockwell et al., 1988; Hubbard et al., 2014) and in the hanging wall of the southern San Cayetano fault based on the uplift rate from Hughes et al. (2018). Local  $K$  values for the eastern and western sections of the San Cayetano fault were based on the uplift rates re-evaluated here and included in Table 1.

We then input  $K$  values into the formula for knickpoint celerity ( $v$ ; Equation 2) to calculate declining  $v$  upstream as a function of  $A$  for each increment (i.e., one cell in the DEM) along the stream:

$$v = KA^m S^{n-1} \quad (\text{Equation 2}),$$

We convert  $v$  to time by dividing the distance between each increment by  $v$  and then take the sum of time increments for the length of the stream up to 0.5 km from the drainage divide to represent the fluvial retreat rate.

#### 4. DISCUSSION OF ALTERNATIVE ISOCHRON AGES

We removed sample HCR-2 from the isochron at the base of the Las Posas Formation in the hanging wall of the Ventura fault (isochron HCR) because the sample plotted above the surface production ratio. Including this sample in the regression makes almost no difference to the final isochron age. The slope of isochron HCR is also strongly dependent on the  $^{26}\text{Al}/^{10}\text{Be}$  ratio of the highest concentration sample, sample HCR-6 (Fig. 4A). If HCR-6 is not included in

the regression, then the isochron produces a burial age of  $0.55^{+0.15}_{-0.16}$  Ma, which overlaps in uncertainty with the age of  $0.60^{+0.05}_{-0.06}$  Ma that results from including sample HCR-6 (Table S6). Therefore, we can be reasonably confident that the sample HCR-6 is not an outlier.

For our preferred age for the sample suite from the top of the exposed Saugus Formation in the hanging wall of the Ventura fault (isochron SVF), we removed sample SVF-C which has a  $^{10}\text{Be}$  concentration  $>3\sigma$  away from the most likely isochron line. We interpret SVF-C as an outlier because the sample plots above the surface production ratio of 6.75 (Fig. 4B). We also removed sample SVF-B, which has an anomalously low  $^{26}\text{Al}/^{10}\text{Be}$  ratio and has a  $^{10}\text{Be}$  concentration more than  $3\sigma$  away from the most likely isochron line (Fig. 4B). Including both of the aforementioned outliers in the regression makes little difference to the overall age of the isochron. However, removing just sample SVF-C would increase the isochron age to  $0.38^{+0.56}_{-0.58}$  Ma, and removing just sample SVF-B would increase the final burial age to  $0.50 \pm 0.46$  Ma (Table S6). Both alternative ages are within the large uncertainty associated with our preferred age of  $0.36^{+0.22}_{-0.18}$  Ma, but we suggest removing both samples from the regression is justified because both meet the criteria to be treated as outliers.

For the Saugus Formation samples from the hanging wall of the Oak Ridge fault, including the sand samples in the regression would lead to burial ages of  $1.61^{+0.96}_{-0.98}$  Ma for the isochron from the Happy Camp syncline (isochron SCQ) and  $1.15^{+0.22}_{-0.26}$  Ma for the isochron from the Long Canyon syncline (isochron SLC; Table S6). Compared to our preferred younger ages of  $1.06^{+0.23}_{-0.26}$  Ma and  $0.98^{+0.20}_{-0.28}$  Ma, respectively, the older ages are not consistent with the independent age for the Saugus Formation at Moorpark of 0.78–0.85 Ma (Wagner et al., 2007) and are less consistent with the  $1.2 \pm 0.3$  Ma age for the Bailey ash mapped several hundred meters stratigraphically below the Saugus Formation in the Pico Formation (Figure 6A; Izett et al., 1974; Boellstorff and Steineck, 1975). The better match of the younger ages with the existing chronology provides further justification for excluding the sand samples for these isochrons. For the isochron from the Grimes Canyon Deltaic facies (isochron SGC2), we removed one sample (SGC2-C) from the regression that has both  $^{10}\text{Be}$  and  $^{26}\text{Al}$  concentrations much more than  $3\sigma$  away from the preferred regression line and is clearly an outlier (Fig. 4E).

In the eastern Ventura basin, an alternative burial age for the Sunshine Ranch Member (isochron SI5) is  $\sim 5.97^{+3.44}_{-3.50}$  Ma compared with  $3.30^{+0.30}_{-0.41}$  Ma if the sand sample (SI5-S) is omitted (Table S6). A slightly older age is still consistent with the age range of 5.3–3.6 suggested by  $^{87}\text{Sr}/^{86}\text{Sr}$  dating on the underlying Pico Formation (Buczek et al., 2021). However, the younger burial age also overlaps with the  $^{87}\text{Sr}/^{86}\text{Sr}$  age within the 95% confidence limits and the  $^{87}\text{Sr}/^{86}\text{Sr}$  age is thought to be an overestimate (Buczek et al., 2021). For our preferred age for the isochron from the upper part of the Saugus Formation (isochron STL) of  $0.83^{+0.36}_{-0.41}$  Ma, we omitted the sand sample (STL-7) and the sample STL-3, which has  $^{10}\text{Be}$  concentration  $>3\sigma$  away from any possible regression line (Fig. 4G). However, the sand sample could form part of a possible regression line with the four lower concentration samples (Fig. 4G). If we assumed the sand sample was not an outlier, then we would have to treat sample STL-5 as an outlier because in this alternative interpretation the  $^{10}\text{Be}$  concentration for sample STL-5 would be much greater than  $3\sigma$  away from the alternative regression line (Fig. 4G). The alternative interpretation without STL-5 results in a burial age of  $2.66^{+0.24}_{-0.30}$  Ma (Table S6). Another alternative isochron including both STL-5 and the sand sample gives a burial age of  $2.2^{+1.46}_{-1.48}$  Ma (Table S6). However, both these alternative ages are incompatible with the identification of the 0.76 Ma Bishop ash stratigraphically just below the sample location (Fig. S4; Levi and Yeats, 1993), which further supports our preferred age.

## REFERENCES CITED

- Balco, G., and Rovey, C.W., 2008, An isochron method for cosmogenic-nuclide dating of buried soils and sediments: *American Journal of Science*, v. 308, no. 10, p. 1083–1114, <https://doi.org/10.2475/10.2008.02>.
- Balco, G., Stone, J.O., Lifton, N.A., and Dunai, T.J., 2008, A complete and easily accessible means of calculating surface exposure ages or erosion rates from  $^{10}\text{Be}$  and  $^{26}\text{Al}$  measurements: *Quaternary Geochronology*, v. 3, no. 3, p. 174–195, <https://doi.org/10.1016/j.quageo.2007.12.001>.
- Balco, G., Soreghan, G.S., Sweet, D.E., Marra, K.R., and Bierman, P.R., 2013, Cosmogenic-nuclide burial ages for Pleistocene sedimentary fill in Unaweep Canyon, Colorado, USA: *Quaternary Geochronology*, v. 18, p. 149–157, <https://doi.org/10.1016/j.quageo.2013.02.002>.
- Behr, W., Rood, D., Fletcher, K., Guzman, N., Finkel, R., Hanks, T.C., Hudnut, K., Kendrick, K., Platt, J., and Sharp, W., 2010, Uncertainties in slip-rate estimates for the Mission Creek strand of the southern San Andreas fault at Biskra Palms Oasis, southern California: *Geological Society of America Bulletin*, v. 122, no. 9–10, p. 1360–1377, <https://doi.org/10.1130/B30020.1>.
- Bender, A.M., Amos, C.B., Bierman, P., Rood, D.H., Staisch, L., Kelsey, H., and Sherrod, B., 2016, Differential uplift and incision of the Yakima River terraces, central Washington State: *Journal of Geophysical Research. Solid Earth*, v. 121, no. 1, p. 365–384, <https://doi.org/10.1002/2015JB012303>.
- Bierman, P., and Gillespie, A., 1991, Range fires: A significant factor in exposure-age determination and geomorphic surface evolution: *Geology*, v. 19, no. 6, p. 641–644, [https://doi.org/10.1130/0091-7613\(1991\)019<0641:RFASFI>2.3.CO;2](https://doi.org/10.1130/0091-7613(1991)019<0641:RFASFI>2.3.CO;2).
- Bierman, P., and Steig, E.J., 1996, Estimating rates of denudation using cosmogenic isotope abundances in sediment: *Earth Surface Processes and Landforms*, v. 21, no. 2, p. 125–139, [https://doi.org/10.1002/\(SICI\)1096-9837\(199602\)21:2<125::AID-ESP511>3.0.CO;2-8](https://doi.org/10.1002/(SICI)1096-9837(199602)21:2<125::AID-ESP511>3.0.CO;2-8).
- Boellstorff, J.D., and Steineck, P.L., 1975, The stratigraphic significance of fission-track ages on volcanic ashes in the marine late Cenozoic of southern California: *Earth and Planetary Science Letters*, v. 27, no. 2, p. 143–154, [https://doi.org/10.1016/0012-821X\(75\)90023-0](https://doi.org/10.1016/0012-821X(75)90023-0).
- Buczek, A.J., Hendy, A.J., Hopkins, M.J. and Sessa, J.A., 2021. On the reconciliation of biostratigraphy and strontium isotope stratigraphy of three southern Californian Plio-Pleistocene formations. *Geological Society of America Bulletin*, 133(1-2), pp.100-114.
- Campbell, R.H., Wills, C.J., Irvine, P.J. and Swanson, B.J., 2014, Preliminary geologic map of the Los Angeles 30'×60' quadrangle, Southern California: California Geological Survey, scale 1:100,000, p. 2331–1258.
- Chmeleff, J., von Blanckenburg, F., Kossert, K., and Jakob, D., 2010, Determination of the  $^{10}\text{Be}$  half-life by multicollector ICP-MS and liquid scintillation counting: *Nuclear Instruments & Methods in Physics Research. Section B, Beam Interactions with Materials and Atoms*, v. 268, no. 2, p. 192–199, <https://doi.org/10.1016/j.nimb.2009.09.012>.
- Çiner, A., Doğan, U., Yıldırım, C., Akçar, N., Ivy-Ochs, S., Alfimov, V., Kubik, P.W., and Schlüchter, C., 2015, Quaternary uplift rates of the Central Anatolian Plateau, Turkey: insights from cosmogenic isochron-burial nuclide dating of the Kızılırmak River terraces:

- Quaternary Science Reviews, v. 107, p. 81–97, <https://doi.org/10.1016/j.quascirev.2014.10.007>.
- Corbett, L.B., Bierman, P.R., and Rood, D.H., 2016b, An approach for optimizing in situ cosmogenic  $^{10}\text{Be}$  sample preparation: Quaternary Geochronology, v. 33, p. 24–34, <https://doi.org/10.1016/j.quageo.2016.02.001>.
- Cyr, A.J., Granger, D.E., Olivetti, V., and Molin, P., 2010, Quantifying rock uplift rates using channel steepness and cosmogenic nuclide–determined erosion rates: Examples from northern and southern Italy: Lithosphere, v. 2, no. 3, p. 188–198, <https://doi.org/10.1130/L96.1>.
- D’Arcy, M., and Whittaker, A.C., 2014, Geomorphic constraints on landscape sensitivity to climate in tectonically active areas: Geomorphology, v. 204, p. 366–381, <https://doi.org/10.1016/j.geomorph.2013.08.019>.
- Densmore, A.L., Dawers, N.H., Gupta, S., Guidon, R., and Goldin, T., 2004, Footwall topographic development during continental extension: Journal of Geophysical Research. Earth Surface, v. 109, F3.
- DeVecchio, D.E., Heermance, R.V., Fuchs, M., and Owen, L.A., 2012a, Climate-controlled landscape evolution in the Western Transverse Ranges, California: Insights from Quaternary geochronology of the Saugus Formation and strath terrace flights: Lithosphere, v. 4, no. 2, p. 110–130, <https://doi.org/10.1130/L176.1>.
- DeVecchio, D.E., Keller, E.A., Fuchs, M., and Owen, L.A., 2012b, Late Pleistocene structural evolution of the Camarillo fold belt: Implications for lateral fault growth and seismic hazard in Southern California: Lithosphere, v. 4, no. 2, p. 91–109, <https://doi.org/10.1130/L136.1>.
- DiBiase, R.A., and Whipple, K.X., 2011, The influence of erosion thresholds and runoff variability on the relationships among topography, climate, and erosion rate: Journal of Geophysical Research. Earth Surface, v. 116, F4.
- DiBiase, R.A., Whipple, K.X., Heimsath, A.M., and Ouimet, W.B., 2010, Landscape form and millennial erosion rates in the San Gabriel Mountains, CA: Earth and Planetary Science Letters, v. 289, no. 1–2, p. 134–144, <https://doi.org/10.1016/j.epsl.2009.10.036>.
- Dibblee, T.W., Jr., and Ehrenspeck, H.E., 1988, Geologic map of the Ventura and Pitas Point Quadrangles, Ventura County, California: Dibblee Geological Foundation map, Santa Barbara, California, scale, 1:24,000.
- Dibblee, T.W., Jr., and Ehrenspeck, H.E., 1992, Geologic map of the Simi Quadrangle, Ventura County, California: Dibblee Geological Foundation map DF-39, Santa Barbara, California, scale, 1:24,000.
- Erlanger, E.D., Granger, D.E., and Gibbon, R.J., 2012, Rock uplift rates in South Africa from isochron burial dating of fluvial and marine terraces: Geology, v. 40, no. 11, p. 1019–1022, <https://doi.org/10.1130/G33172.1>.
- Finnegan, N.J., Hallet, B., Montgomery, D.R., Zeitler, P.K., Stone, J.O., Anders, A.M., and Yuping, L., 2008, Coupling of rock uplift and river incision in the Namche Barwa–Gyala Peri massif, Tibet: Geological Society of America Bulletin, v. 120, no. 1–2, p. 142–155, <https://doi.org/10.1130/B26224.1>.
- Frankel, K.L., Brantley, K.S., Dolan, J.F., Finkel, R.C., Klinger, R.E., Knott, J.R., Machette, M.N., Owen, L.A., Phillips, F.M., Slate, J.L., and Wernicke, B.P., 2007, Cosmogenic Be-10 and Cl-36 geochronology of offset alluvial fans along the northern Death Valley fault zone: Implications for transient strain in the eastern California shear zone: Journal of Geophysical Research. Solid Earth, v. 112, B6.

- Granger, D.E., Kirchner, J.W., and Finkel, R., 1996, Spatially averaged long-term erosion rates measured from in situ-produced cosmogenic nuclides in alluvial sediment: *The Journal of Geology*, v. 104, no. 3, p. 249–257, <https://doi.org/10.1086/629823>.
- Granger, D.E., and Muzikar, P.F., 2001, Dating sediment burial with in situ-produced cosmogenic nuclides: theory, techniques, and limitations: *Earth and Planetary Science Letters*, v. 188, no. 1–2, p. 269–281, [https://doi.org/10.1016/S0012-821X\(01\)00309-0](https://doi.org/10.1016/S0012-821X(01)00309-0).
- Heyman, J., Applegate, P.J., Blomdin, R., Gribenski, N., Harbor, J.M., and Stroeve, A.P., 2016, Boulder height–exposure age relationships from a global glacial  $^{10}\text{Be}$  compilation: *Quaternary Geochronology*, v. 34, p. 1–11, <https://doi.org/10.1016/j.quageo.2016.03.002>.
- Heirshberg, T.L., 1997, Actualistic petrofacies analysis of the Pliocene-Pleistocene Saugus Formation, Ventura Basin, Southern California: implications for provenance, paleotectonics, and paleogeography [Ph.D. dissertation]: University of California, Los Angeles.
- Howard, A.D., and Kerby, G., 1983, Channel changes in badlands: *Geological Society of America Bulletin*, v. 94, no. 6, p. 739–752, [https://doi.org/10.1130/0016-7606\(1983\)94<739:CCIB>2.0.CO;2](https://doi.org/10.1130/0016-7606(1983)94<739:CCIB>2.0.CO;2).
- Hubbard, J., Shaw, J.H., Dolan, J., Pratt, T.L., McAuliffe, L., and Rockwell, T.K., 2014, Structure and Seismic Hazard of the Ventura Avenue Anticline and Ventura Fault, California: Prospect for Large, Multisegment Ruptures in the Western Transverse Ranges: *Bulletin of the Seismological Society of America*, v. 104, no. 3, p. 1070–1087, <https://doi.org/10.1785/0120130125>.
- Hughes, A., Rood, D.H., Whittaker, A.C., Bell, R.E., Rockwell, T.K., Levy, Y., Wilcken, K.M., Corbett, L.B., Bierman, P.R., DeVecchio, D.E., Marshall, S.T., Gurrola, L.D., and Nicholson, C., 2018, Geomorphic evidence for the geometry and slip rate of a young, low-angle thrust fault: Implications for hazard assessment and fault interaction in complex tectonic environments: *Earth and Planetary Science Letters*, v. 504, p. 198–210, <https://doi.org/10.1016/j.epsl.2018.10.003>.
- Huftile, G.J., and Yeats, R.S., 1996, Deformation rates across the Placerita (Northridge Mw= 6.7 aftershock zone) and Hopper Canyon segments of the western Transverse Ranges deformation belt: *Bulletin of the Seismological Society of America*, v. 86, 1B, p. S3–S18.
- Izett, G., Naeser, C., and Obradovich, J., 1974, Fission-track age of zircons from an ash bed in the Pico Formation (Pliocene and Pleistocene) near Ventura, California, *Geol. Soc. Am. Abstr. Programs*, pp. 197.
- Jull, A.T., Scott, E.M., and Bierman, P., 2015, The CRONUS-Earth inter-comparison for cosmogenic isotope analysis: *Quaternary Geochronology*, v. 26, p. 3–10, <https://doi.org/10.1016/j.quageo.2013.09.003>.
- Kirby, E., and Whipple, K., 2001, Quantifying differential rock-uplift rates via stream profile analysis: *Geology*, v. 29, no. 5, p. 415–418, [https://doi.org/10.1130/0091-7613\(2001\)029<0415:QDRURV>2.0.CO;2](https://doi.org/10.1130/0091-7613(2001)029<0415:QDRURV>2.0.CO;2).
- Kirby, E., Whipple, K.X., Tang, W., and Chen, Z., 2003, Distribution of active rock uplift along the eastern margin of the Tibetan Plateau: Inferences from bedrock channel longitudinal profiles: *Journal of Geophysical Research. Solid Earth*, v. 108, B4, p. 1–24.
- Lal, D., 1988, In situ-produced cosmogenic isotopes in terrestrial rocks: *Annual Review of Earth and Planetary Sciences*, v. 16, no. 1, p. 355–388, <https://doi.org/10.1146/annurev.ea.16.050188.002035>.



- Lal, D., 1991, Cosmic ray labeling of erosion surfaces: in situ nuclide production rates and erosion models: *Earth and Planetary Science Letters*, v. 104, no. 2–4, p. 424–439, [https://doi.org/10.1016/0012-821X\(91\)90220-C](https://doi.org/10.1016/0012-821X(91)90220-C).
- Lal, D., and Peters, B., 1967. Cosmic ray produced radioactivity on the earth, *Cosmic Rays II*: Springer, p. 551–612.
- Lavé, J., and Avouac, J., 2001, Fluvial incision and tectonic uplift across the Himalayas of central Nepal: *Journal of Geophysical Research. Solid Earth*, v. 106, B11, p. 26561–26591, <https://doi.org/10.1029/2001JB000359>.
- Levi, S., and Yeats, R.S., 1993, Paleomagnetic Constraints on the Initiation of Uplift on the Santa-Susana Fault, Western Transverse Ranges, California: *Tectonics*, v. 12, no. 3, p. 688–702, <https://doi.org/10.1029/93TC00133>.
- Lifton, N., Caffee, M., Finkel, R., Marrero, S., Nishiizumi, K., Phillips, F.M., Goehring, B., Gosse, J., Stone, J., and Schaefer, J., 2015, In situ cosmogenic nuclide production rate calibration for the CRONUS-Earth project from Lake Bonneville, Utah, shoreline features: *Quaternary Geochronology*, v. 26, p. 56–69, <https://doi.org/10.1016/j.quageo.2014.11.002>.
- Mudd, S.M., Harel, M.-A., Hurst, M.D., Grieve, S.W., and Marrero, S.M., 2016, The CAIRN method: automated, reproducible calculation of catchment-averaged denudation rates from cosmogenic nuclide concentrations: *Earth Surface Dynamics*, v. 4, no. 3, p. 655–674, <https://doi.org/10.5194/esurf-4-655-2016>.
- Niemi, N.A., Oskin, M., Burbank, D.W., Heimsath, A.M., and Gabet, E.J., 2005, Effects of bedrock landslides on cosmogenically determined erosion rates: *Earth and Planetary Science Letters*, v. 237, no. 3–4, p. 480–498, <https://doi.org/10.1016/j.epsl.2005.07.009>.
- Nishiizumi, K., 2004, Preparation of  $^{26}\text{Al}$  AMS standards: *Nuclear Instruments & Methods in Physics Research. Section B, Beam Interactions with Materials and Atoms*, v. 223–224, p. 388–392, <https://doi.org/10.1016/j.nimb.2004.04.075>.
- Nishiizumi, K., Winterer, E., Kohl, C., Klein, J., Middleton, R., Lal, D., and Arnold, J., 1989, Cosmic ray production rates of  $^{10}\text{Be}$  and  $^{26}\text{Al}$  in quartz from glacially polished rocks: *Journal of Geophysical Research. Solid Earth*, v. 94, B12, p. 17907–17915, <https://doi.org/10.1029/JB094iB12p17907>.
- Nishiizumi, K., Imamura, M., Caffee, M.W., Southon, J.R., Finkel, R.C., and McAninch, J., 2007, Absolute calibration of  $^{10}\text{Be}$  AMS standards: *Nuclear Instruments & Methods in Physics Research. Section B, Beam Interactions with Materials and Atoms*, v. 258, no. 2, p. 403–413, <https://doi.org/10.1016/j.nimb.2007.01.297>.
- Owen, L.A., Clemmens, S.J., Finkel, R.C., and Gray, H., 2014, Late Quaternary alluvial fans at the eastern end of the San Bernardino Mountains, Southern California: *Quaternary Science Reviews*, v. 87, p. 114–134, <https://doi.org/10.1016/j.quascirev.2014.01.003>.
- Rockwell, T., Keller, E., and Dembroff, G., 1988, Quaternary rate of folding of the Ventura Avenue anticline, western Transverse Ranges, southern California: *Geological Society of America Bulletin*, v. 100, no. 6, p. 850–858, [https://doi.org/10.1130/0016-7606\(1988\)100<0850:QROFOT>2.3.CO;2](https://doi.org/10.1130/0016-7606(1988)100<0850:QROFOT>2.3.CO;2).
- Roda-Boluda, D.C., D’Arcy, M., Whittaker, A.C., Gheorghiu, D.M., and Rodés, Á., 2019,  $^{10}\text{Be}$  erosion rates controlled by transient response to normal faulting through incision and landsliding: *Earth and Planetary Science Letters*, v. 507, p. 140–153, <https://doi.org/10.1016/j.epsl.2018.11.032>.
- Rood, D.H., Hall, S., Guilderson, T.P., Finkel, R.C., and Brown, T.A., 2010, Challenges and opportunities in high-precision Be-10 measurements at CAMS: *Nuclear Instruments &*



- Methods in Physics Research. Section B, Beam Interactions with Materials and Atoms, v. 268, no. 7–8, p. 730–732, <https://doi.org/10.1016/j.nimb.2009.10.016>.
- Rood, D.H., Burbank, D.W., and Finkel, R.C., 2011, Chronology of glaciations in the Sierra Nevada, California, from  $^{10}\text{Be}$  surface exposure dating: *Quaternary Science Reviews*, v. 30, no. 5–6, p. 646–661, <https://doi.org/10.1016/j.quascirev.2010.12.001>.
- Schwanghart, W., and Scherler, D., 2014, Short Communication: TopoToolbox 2 - MATLAB-based software for topographic analysis and modeling in Earth surface sciences: *Earth Surface Dynamics*, v. 2, p. 1–7, <https://doi.org/10.5194/esurf-2-1-2014>.
- Snyder, N.P., Whipple, K.X., Tucker, G.E., and Merritts, D.J., 2000, Landscape response to tectonic forcing: Digital elevation model analysis of stream profiles in the Mendocino triple junction region, northern California: *Geological Society of America Bulletin*, v. 112, no. 8, p. 1250–1263, [https://doi.org/10.1130/0016-7606\(2000\)112<1250:LRTTFD>2.0.CO;2](https://doi.org/10.1130/0016-7606(2000)112<1250:LRTTFD>2.0.CO;2).
- Stone, J.O., 2000, Air pressure and cosmogenic isotope production: *Journal of Geophysical Research. Solid Earth*, v. 105, B10, p. 23753–23759, <https://doi.org/10.1029/2000JB900181>.
- Tucker, G., and Whipple, K., 2002, Topographic outcomes predicted by stream erosion models: Sensitivity analysis and intermodel comparison. *Journal of Geophysical Research: Solid Earth*, v. 107, no. B9, p. 1–1–1–16.
- Wagner, H.M., Lander, B., Roeder, M.A., Prothero, D.R., McDaniel, G.E., Jr., 2007, A new Irvingtonian land mammal assemblage from the Saugus Formation, Moorpark, Ventura County, California: *Bulletin of the Southern California Academy of Sciences*, v. 106, no. 2, p. 141.
- Wehmiller, J., Lajoie, K., Sarna-Wojcicki, A., Yerkes, R., Kennedy, G., Stephens, T., Kohl, R., and Zartman, R., 1978, Amino acid racemization dating of Quaternary mollusks, Pacific coast United States: *U.S. Geological Survey Open-File Report*, v. 78, no. 701, p. 445–448.
- Wesnowsky, S.G., Briggs, R.W., Caffee, M.W., Ryerson, F., Finkel, R.C., and Owen, L.A., 2016, Terrestrial cosmogenic surface exposure dating of glacial and associated landforms in the Ruby Mountains-East Humboldt Range of central Nevada and along the northeastern flank of the Sierra Nevada: *Geomorphology*, v. 268, p. 72–81, <https://doi.org/10.1016/j.geomorph.2016.04.027>.
- Whipple, K.X., and Tucker, G.E., 1999, Dynamics of the stream-power river incision model: Implications for height limits of mountain ranges, landscape response timescales, and research needs: *Journal of Geophysical Research. Solid Earth*, v. 104, B8, p. 17661–17674, <https://doi.org/10.1029/1999JB900120>.
- Whipple, K.X., and Tucker, G.E., 2002, Implications of sediment-flux-dependent river incision models for landscape evolution: *Journal of Geophysical Research. Solid Earth*, v. 107, B2, p. ETG-3.
- Wilcken, K., Fink, D., Hotchkis, M., Garton, D., Button, D., Mann, M., Kitchen, R., Hauser, T., and O'Connor, A., 2017, Accelerator Mass Spectrometry on SIRIUS: New 6MV spectrometer at ANSTO: *Nuclear Instruments and Methods in Physics Research Section B*, v. 406, p. 278–282, <https://doi.org/10.1016/j.nimb.2017.01.003>.
- Wilcken, K.M., Fujioka, T., Fink, D., Fülöp, R.H., Codilean, A.T., Simon, K., Mifsud, C., and Kotevski, S., 2019, SIRIUS Performance:  $^{10}\text{Be}$ ,  $^{26}\text{Al}$  and  $^{36}\text{Cl}$  measurements at ANSTO. *Nucl. Instruments Methods Phys. Res. Sect. B Beam Interact. with Mater: Atoms*, v. 455, p. 300–304, <https://doi.org/10.1016/j.nimb.2019.02.009>.
- Wobus, C., Whipple, K.X., Kirby, E., Snyder, N., Johnson, J., Spyropolou, K., Crosby, B., Sheehan, D., and Willett, S., 2006a, Tectonics from topography: Procedures, promise, and

- pitfalls: Geological Society of America. Special Paper, v. 398, p. 55–74,  
[https://doi.org/10.1130/2006.2398\(04\)](https://doi.org/10.1130/2006.2398(04)).
- Yanites, B.J., Tucker, G.E., and Anderson, R.S., 2009, Numerical and analytical models of cosmogenic radionuclide dynamics in landslide-dominated drainage basins: *Journal of Geophysical Research. Earth Surface*, v. 114, F1.
- Yeats, R.S., 1988, Late Quaternary slip rate on the Oak Ridge fault, Transverse Ranges, California: Implications for seismic risk: *Journal of Geophysical Research*, v. 93, B10, p. 12137–12149, <https://doi.org/10.1029/JB093iB10p12137>.
- York, D., 1966, Least-squares fitting of a straight line: *Canadian Journal of Physics*, v. 44, no. 5, p. 1079–1086.

**A: Present day**

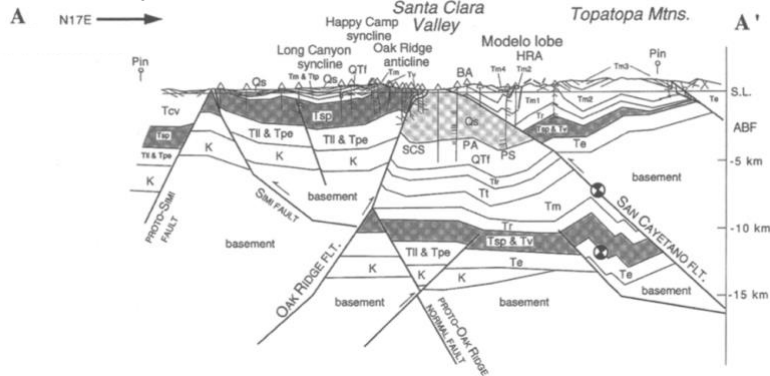

**B: 0.7–1.29 Ma  
(0.5 Ma)**

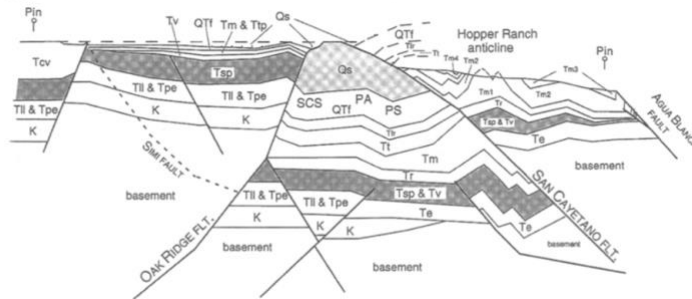

**C: 0.94–1.18 Ma  
(0.975 Ma)**

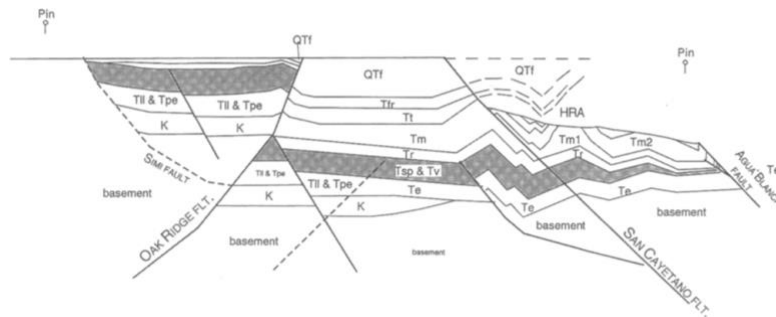

**Figure S1.** Balanced cross sections through the Long Canyon syncline taken from Huftile and Yeats (1996). The dip-slip offsets, which are included in Table 1, were calculated in Huftile and Yeats (1996) by retro-deforming these balanced cross sections. (A) Present day. (B) Retro-deformed to the top of the exposed Saugus Formation. (C) Retro-deformed to the base of the Las Posas Formation. Ages in boxes refer to the isochron burial ages for the appropriate horizon and the age in brackets below refers to the age interpretation for the same horizon in Huftile and Yeats (1996). Line of section is included on Figure 1.

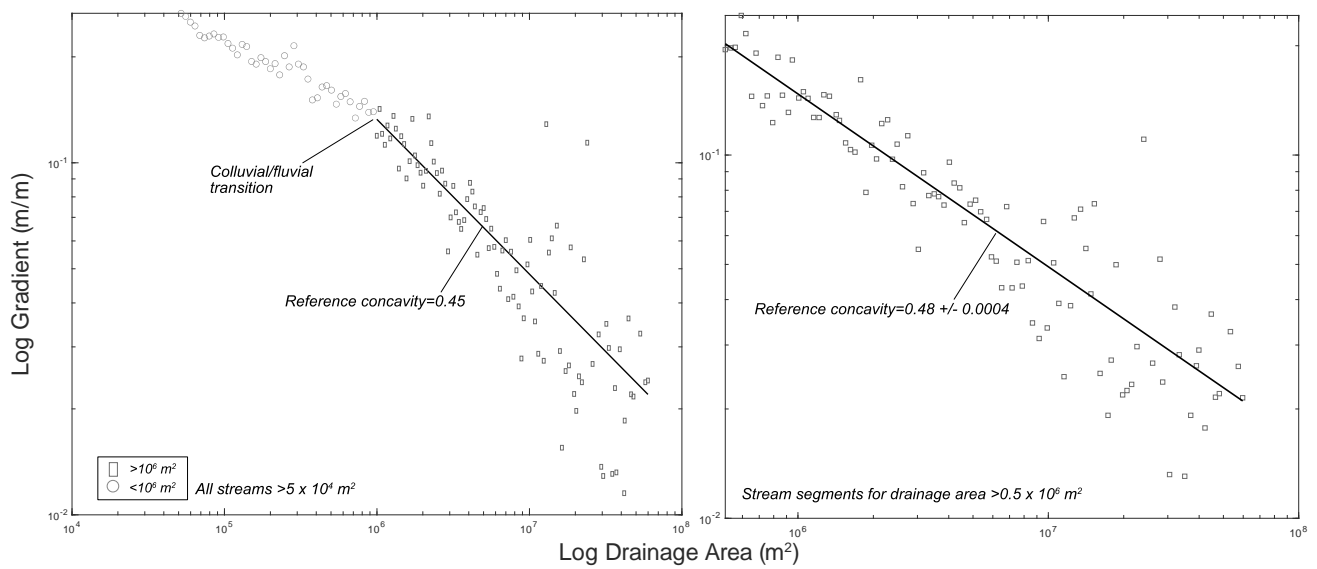

**Figure S2.** Log-gradient as a function of log-drainage area for the study area. The plot on the left is for all streams with upstream drainage area  $> 50,000 m^2$ , which indicates a threshold drainage area of  $10^6 m^2$ . However, using a threshold drainage area of  $10^6 m^2$  results in stream heads that are not consistent with stream heads visible in the  $10 m^2$  digital elevation model. The plot on the right is for all stream segments shown in figure 8A with drainage area  $> 0.5 \times 10^6 m^2$ . The slope of  $0.48 \pm 0.0004$  (error is one standard error) in the plot on the right is used to justify our reference concavity of 0.50.

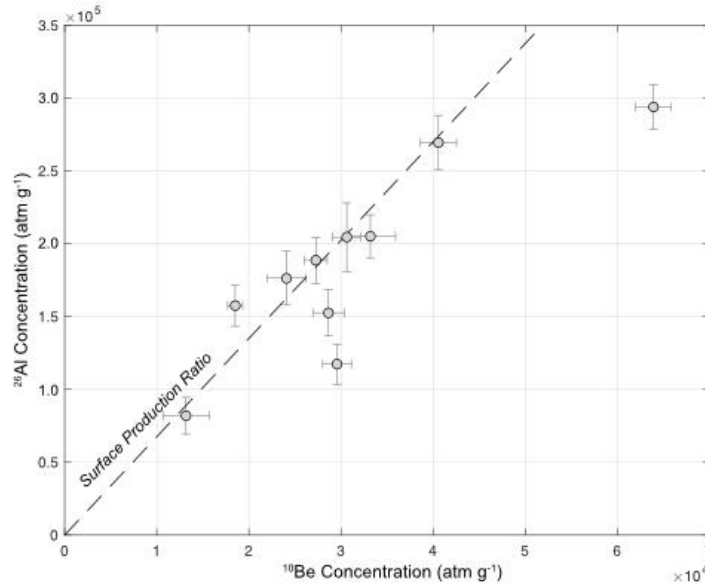

**Figure S3.** A plot of  $^{26}\text{Al}$ - $^{10}\text{Be}$  concentrations (gray circles) for the burial dating samples collected from the top of the exposed Saugus Formation in the hanging wall of the Southern San Cayetano fault. Error bars are  $1\sigma$ . Several of the samples are indistinguishable from the surface production ratio (dashed black line), which indicates that they may be too young for  $^{26}\text{Al}/^{10}\text{Be}$  isochron burial dating.

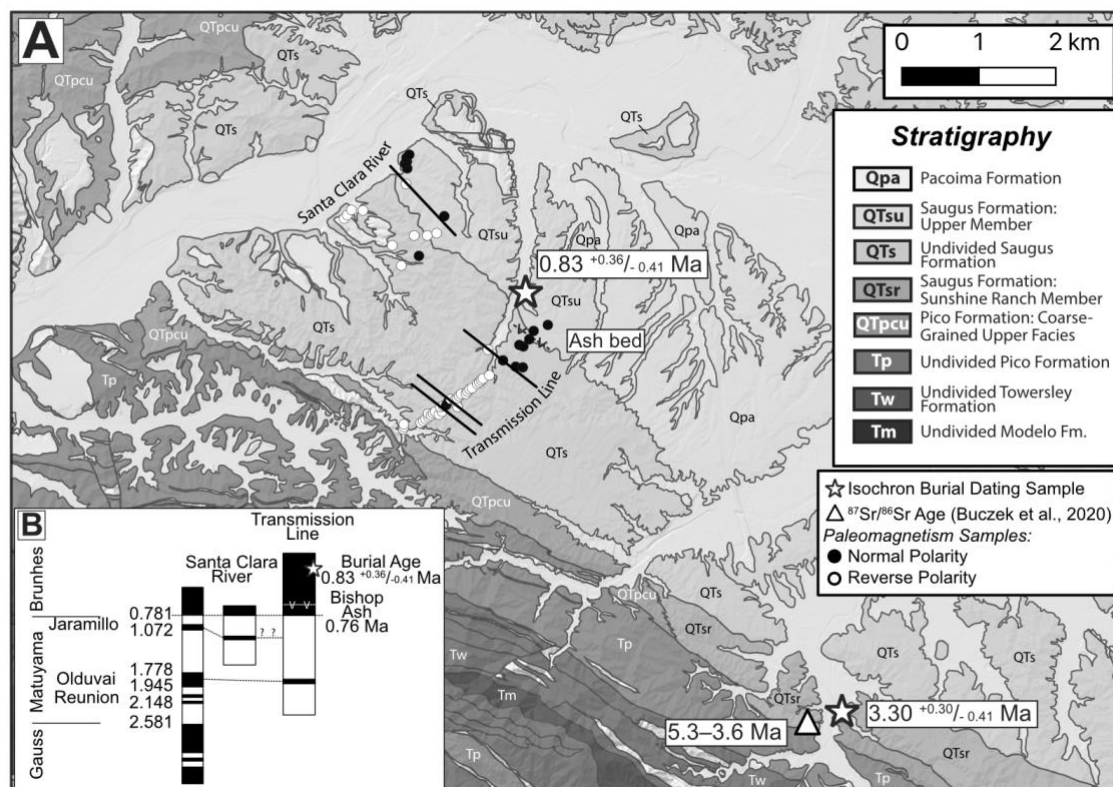

**Figure S4.** (A) Geological map showing the location of isochron burial dating samples (stars) in the eastern Ventura basin. Mapped geological units are from Campbell et al. (2014). The colored circles represent the locations of paleomagnetic samples, which along with the location of the ash layer (dashed line with v's), are taken from Levi and Yeats (1993). Map location is shown on Figure 1. (B) Interpretation of the paleomagnetic samples from Levi and Yeats (1993) based on the correlation of the ash layer in the Saugus Formation with the 0.76 Ma Bishop Ash.

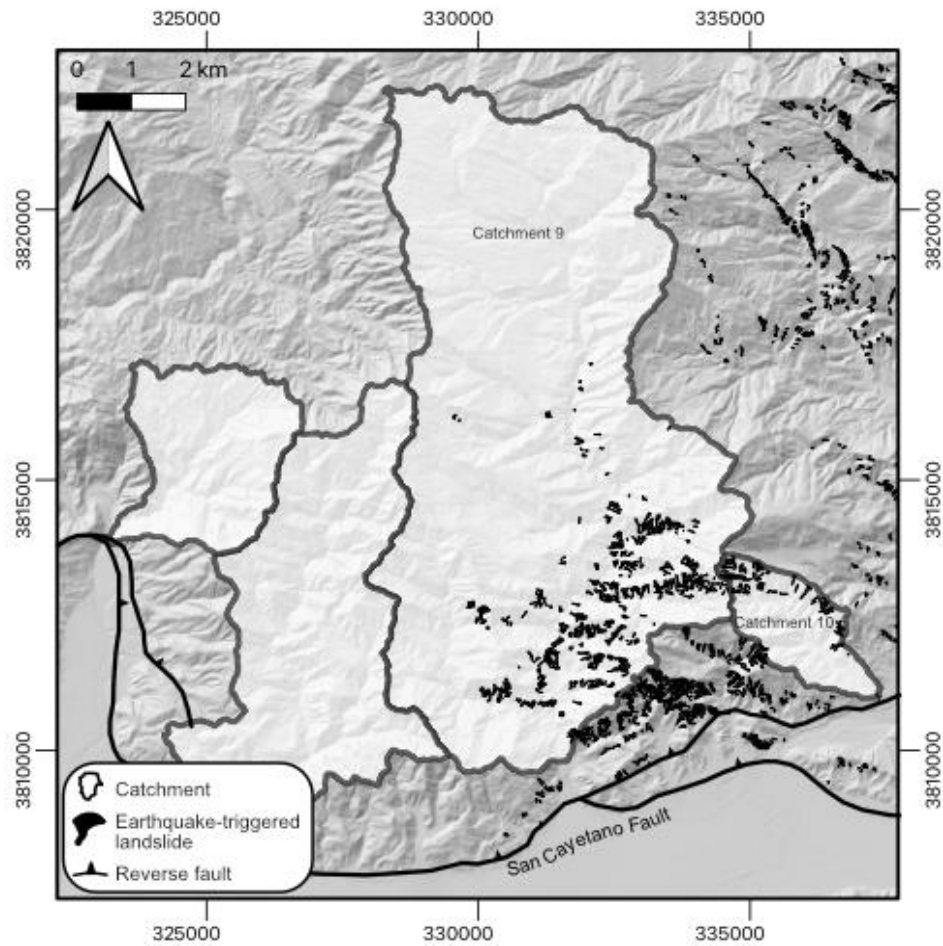

**Figure S5.** Landslides in the hanging wall of the eastern section of the San Cayetano fault triggered by the 1994 M 6.7 Northridge earthquake. Landslides originally mapped by Harp and Jibson (1995) and recently amended by Townsend et al. (2020). Northridge earthquake landslides cover 2% of the surface area of catchment 9 and 5% of the surface area of catchment 10.

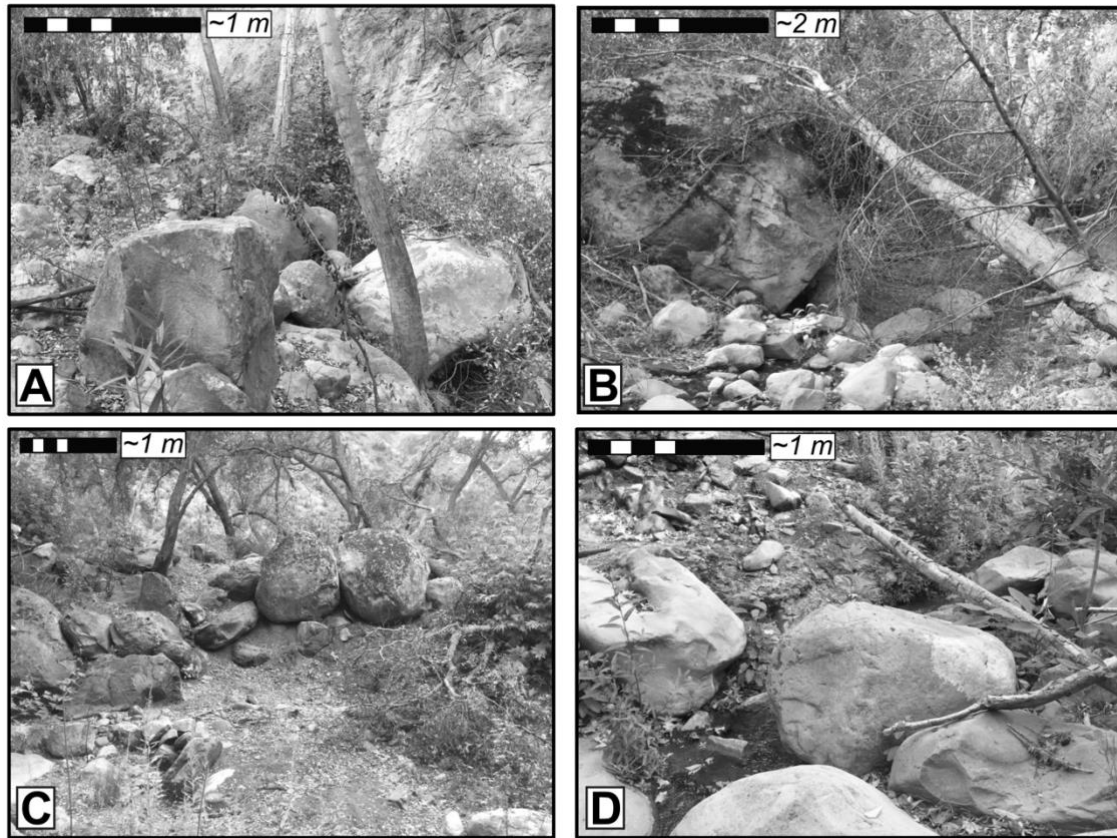

**Figure S6.** Photos showing large boulders in Sisar Creek (catchment 5). Boulders occasionally in excess of 2 m tall may armour the channel, decrease channel incision, and, therefore, decrease erosion rates measured from channel sands. Photo locations: (A) Lat: 34° 27' 16.662" N, Lon: 119° 8' 2.93" W; (B) Lat: 34° 27' 44.502" N, Lon: 119° 7' 49.94" W; (C) Lat: 34° 27' 16.62" N, Lon: 119° 8' 2.88" W; (D) Lat: 34° 27' 52.482" N, Lon: 119° 7' 48.99" W. Photos provided by Brian Swanson.



**Table S1.** Sensitivity analysis addressing the incorporation of uncertainty in  $^{26}\text{Al}/^{10}\text{Be}$  production ratio into burial ages

| Sample                                        | Preferred Age +/- 95% CI<br>$R_{sp} = 6.75$ (Ma) | Preferred Age Range (Ma) | Age $R_{sp} = 6.25$ (Ma) | Age $R_{sp} = 7.25$ (Ma) | Age $R_{sp} = 6.69$ (Ma) | Age $R_{sp} = 7.28$ (Ma) |
|-----------------------------------------------|--------------------------------------------------|--------------------------|--------------------------|--------------------------|--------------------------|--------------------------|
| Top Saugus, East Ventura Basin (STL)          | $0.83^{+0.36}_{-0.41}$                           | 0.42–1.19                | 0.67                     | 0.98                     | 0.81                     | 0.99                     |
| Top Saugus, Ventura (SVF)                     | $0.36^{+0.18}_{-0.22}$                           | 0.14–0.54                | 0.20                     | 0.51                     | 0.34                     | 0.52                     |
| Base GCDF, Oak Ridge (SGC2)                   | $1.06^{+/-} 0.12$                                | 0.93–1.18                | <i>0.90</i>              | <i>1.20</i>              | 1.04                     | <i>1.21</i>              |
| Saugus, Long Canyon Syncline (SLC)            | $1.06^{+0.23}_{-0.26}$                           | 0.80–1.29                | 0.90                     | 1.21                     | 1.04                     | 1.22                     |
| Base Las Posas, Ventura (HCR)                 | $0.60^{+0.05}_{-0.06}$                           | 0.54–0.65                | <i>0.39</i>              | <i>0.70</i>              | 0.53                     | <i>0.70</i>              |
| Top Saugus, Happy Camp Syncline (SCQ)         | $0.98^{+0.20}_{-0.28}$                           | 0.70–1.18                | 0.82                     | 1.13                     | 0.96                     | 1.13                     |
| Base Sunshine Ranch, East Ventura Basin (SI5) | $3.30^{+0.30}_{-0.41}$                           | 2.89–3.60                | 3.14                     | 3.45                     | 3.28                     | 3.46                     |

$R_{sp}$  is the reference surface production ratio of  $^{26}\text{Al}/^{10}\text{Be}$  and is equal to  $R_m$  from equation 1 of the main manuscript.

$R_{sp}$  values of 6.25 and 7.25 represent the upper and lower bounds of the  $1\sigma$  uncertainty associated with the standard reference production ratio of  $6.75 \pm 0.5$  based on Nishiizumi et al. [1989] and normalized to standard values presented in Nishiizumi et al. [2007].

$R_{sp}$  values of 6.69 and 7.28 represent upper and lower bounds of the 95% confidence limits of the slope of our isochron for samples collected in the modern San Gabriel River that were analyzed to validate the use of the standard reference surface production ratio.

Ages in italics indicate that the age based on an alternative  $R_{sp}$  lies outside of the 95 % confidence limits of the most likely burial age based on the standard reference production ratio of 6.75.

Uncertainties for ages with alternative  $R_{sp}$  are the same as for the preferred age using  $R_{sp} = 6.75$ .

**Table S2.** Full sample parameters for isochron burial dating samples

| <i>Stratigraphic Unit</i>        | <i>Sample ID</i> | <i>Type</i> | <i>Latitude °N<br/>(DD.DD,<br/>WGS84)</i> | <i>Longitude °W<br/>(DD.DD,<br/>WGS84)</i> | <i>Altitude<br/>(m.a.s.l.)<sup>a</sup></i> | <i>Depth<br/>below<br/>surface (m)</i> | <i>Preferred<br/>Isochron<br/>Burial Age +/-<br/>95% CI (Ma)<sup>b</sup></i> |
|----------------------------------|------------------|-------------|-------------------------------------------|--------------------------------------------|--------------------------------------------|----------------------------------------|------------------------------------------------------------------------------|
| Top Saugus, Ventura fault        | SVF-A            | Clast       | 34.28416                                  | -119.29222                                 | 56                                         | 2.0 +/- 0.2                            | 0.38 +0.18/-0.22                                                             |
|                                  | SVF-B            | Clast       |                                           |                                            |                                            |                                        |                                                                              |
|                                  | SVF-C            | Clast       |                                           |                                            |                                            |                                        |                                                                              |
|                                  | SVF-D            | Clast       |                                           |                                            |                                            |                                        |                                                                              |
|                                  | SVF-E            | Clast       |                                           |                                            |                                            |                                        |                                                                              |
|                                  | SVF-F            | Clast       |                                           |                                            |                                            |                                        |                                                                              |
|                                  | SVF-P            | Pebbles     |                                           |                                            |                                            |                                        |                                                                              |
|                                  | SVF-S            | Sand        |                                           |                                            |                                            |                                        |                                                                              |
| Base Las Posas, Ventura fault    | HCR-2            | Clast       | 34.29398                                  | -119.25771                                 | 104                                        | 3.5 +/- 0.4                            | 0.55 +0.08/-0.07                                                             |
|                                  | HCR-3            | Clast       |                                           |                                            |                                            |                                        |                                                                              |
|                                  | HCR-6            | Clast       |                                           |                                            |                                            |                                        |                                                                              |
|                                  | HCR-7            | Clast       |                                           |                                            |                                            |                                        |                                                                              |
|                                  | HCR-8            | Clast       |                                           |                                            |                                            |                                        |                                                                              |
|                                  | HCR-10           | Clast       |                                           |                                            |                                            |                                        |                                                                              |
|                                  | HCR-S            | Sand        |                                           |                                            |                                            |                                        |                                                                              |
|                                  | HRC-P            | Pebbles     |                                           |                                            |                                            |                                        |                                                                              |
| Top Saugus, Happy Camp syncline  | SCQ-A            | Clast       | 34.34104                                  | -118.875349                                | 488                                        | 2.0 +/- 0.2                            | 0.98 +0.20/-0.28                                                             |
|                                  | SCQ-E            | Clast       |                                           |                                            |                                            |                                        |                                                                              |
|                                  | SCQ-F            | Clast       |                                           |                                            |                                            |                                        |                                                                              |
|                                  | SCQ-P            | Pebbles     |                                           |                                            |                                            |                                        |                                                                              |
|                                  | SCQ-S            | Sand        |                                           |                                            |                                            |                                        |                                                                              |
| Top Saugus, Long Canyon syncline | SLC-A            | Clast       | 34.31528                                  | -118.933334                                | 273                                        | 3.8 +/- 0.3                            | 1.06 +0.23/-0.26                                                             |
|                                  | SCL-B            | Clast       |                                           |                                            |                                            |                                        |                                                                              |
|                                  | SLC-C            | Clast       |                                           |                                            |                                            |                                        |                                                                              |
|                                  | SLC-D            | Clast       |                                           |                                            |                                            |                                        |                                                                              |
|                                  | SLC-I            | Clast       |                                           |                                            |                                            |                                        |                                                                              |
|                                  | SLC-J            | Clast       |                                           |                                            |                                            |                                        |                                                                              |
|                                  | SLC-P            | Pebbles     |                                           |                                            |                                            |                                        |                                                                              |
|                                  | SLC-S            | Sand        |                                           |                                            |                                            |                                        |                                                                              |
| Base GCDF+, Oak Ridge fault      | SGC2-E           | Clast       | 34.27778                                  | -118.9075                                  | 323                                        | 2.0 +/- 0.2                            | 1.06 +/- 0.12                                                                |
|                                  | SGC2-A           | Clast       |                                           |                                            |                                            |                                        |                                                                              |
|                                  | SGC2-B           | Clast       |                                           |                                            |                                            |                                        |                                                                              |
|                                  | SGC2-C           | Clast       |                                           |                                            |                                            |                                        |                                                                              |
|                                  | SGC2-G           | Clast       |                                           |                                            |                                            |                                        |                                                                              |
|                                  | SGC2-S           | Sand        |                                           |                                            |                                            |                                        |                                                                              |
| Upper Saugus, east Ventura basin | STL-3            | Clast       | 34.41155                                  | -118.59975                                 | 450                                        | 4.0 +/- 0.2                            | 0.83 +0.36/-0.41                                                             |
|                                  | STL-6            | Clast       |                                           |                                            |                                            |                                        |                                                                              |
|                                  | STL-1            | Clast       |                                           |                                            |                                            |                                        |                                                                              |
|                                  | STL-2            | Clast       |                                           |                                            |                                            |                                        |                                                                              |

**Table S2.** Full sample parameters for isochron burial dating samples (continued)

|                                            |        |         |          |            |     |              |                 |
|--------------------------------------------|--------|---------|----------|------------|-----|--------------|-----------------|
|                                            | STL-5  | Clast   | 34.36167 | -118.55417 | 415 | 25.0 +/- 1.0 | 3.30 +0.30/0.41 |
|                                            | STL-7  | Sand    |          |            |     |              |                 |
|                                            | STL-8  | Pebbles |          |            |     |              |                 |
| Base Sunshine Ranch,<br>east Ventura basin | SI5-F  | Clast   | 34.37591 | -119.04053 | 188 | 3.0 +/- 0.4  | n/a             |
|                                            | SI5-M  | Clast   |          |            |     |              |                 |
|                                            | SI5-N  | Clast   |          |            |     |              |                 |
|                                            | SI5-O  | Clast   |          |            |     |              |                 |
|                                            | SI5-P  | Pebbles |          |            |     |              |                 |
|                                            | SI5-S  | Sand    |          |            |     |              |                 |
|                                            | SI5-U  | Clast   |          |            |     |              |                 |
|                                            | SI5-V  | Clast   |          |            |     |              |                 |
|                                            | SI5-X  | Clast   |          |            |     |              |                 |
|                                            |        |         |          |            |     |              |                 |
| Top Saugus, Southern<br>San Cayetano fault | OCS-1  | Clast   | 34.37591 | -119.04053 | 188 | 3.0 +/- 0.4  | n/a             |
|                                            | OCS-3  | Clast   |          |            |     |              |                 |
|                                            | OCS-6  | Clast   |          |            |     |              |                 |
|                                            | OCS-7  | Clast   |          |            |     |              |                 |
|                                            | OCS-8  | Clast   |          |            |     |              |                 |
|                                            | OCS-9  | Clast   |          |            |     |              |                 |
|                                            | OCS-10 | Clast   |          |            |     |              |                 |
|                                            | OCS-S  | Sand    |          |            |     |              |                 |
|                                            | OCS-P  | Pebbles |          |            |     |              |                 |

*a: Meters above sea level*

*b: Age and uncertainties calculated using Bayesian linear regression method (Bender et al., 2016)*

*+ GCDF = Grimes Canyon Deltaic Facies*

**Table S2.** Full sample parameters for isochron burial dating samples (continued)

| Sample ID | Quartz mass (g) | Be Cathode ID | Be Carrier (g) <sup>a</sup> | <sup>10</sup> Be/ <sup>9</sup> Be AMS <sup>b,c</sup> | <sup>10</sup> Be/ <sup>9</sup> Be AMS 1 $\sigma$ uncert <sup>b,c</sup> | <sup>10</sup> Be Concentration (atoms g <sup>-1</sup> SiO <sub>2</sub> ) <sup>d</sup> | <sup>10</sup> Be 1 $\sigma$ uncert (atoms g <sup>-1</sup> SiO <sub>2</sub> ) <sup>e</sup> | <sup>10</sup> Be 1 $\sigma$ uncert (%) | Al Cathode ID | Total Al ( $\mu$ g) | <sup>26</sup> Al/ <sup>27</sup> Al AMS <sup>c,f</sup> | <sup>26</sup> Al/ <sup>27</sup> Al AMS 1 $\sigma$ | <sup>26</sup> Al Concentration (atoms g <sup>-1</sup> SiO <sub>2</sub> ) <sup>g</sup> | <sup>26</sup> Al 1 $\sigma$ uncert (atoms g <sup>-1</sup> SiO <sub>2</sub> ) <sup>e</sup> | <sup>26</sup> Al 1 $\sigma$ uncert (%) |
|-----------|-----------------|---------------|-----------------------------|------------------------------------------------------|------------------------------------------------------------------------|---------------------------------------------------------------------------------------|-------------------------------------------------------------------------------------------|----------------------------------------|---------------|---------------------|-------------------------------------------------------|---------------------------------------------------|---------------------------------------------------------------------------------------|-------------------------------------------------------------------------------------------|----------------------------------------|
| SVF-A     | 20.9960         | BE37797       | 1.0059                      | 1.292E-14                                            | 6.578E-16                                                              | 7145                                                                                  | 468                                                                                       | 6.5                                    | a2059         | 2124                | 2.121E-14                                             | 2.28E-15                                          | 46002                                                                                 | 5269                                                                                      | 11.5                                   |
| SVF-B     | 11.9290         | BE37798       | 1.0069                      | 8.203E-15                                            | 5.107E-16                                                              | 7163                                                                                  | 672                                                                                       | 9.4                                    | a2061         | 2001                | 8.995E-15                                             | 1.55E-15                                          | 30554                                                                                 | 6061                                                                                      | 19.8                                   |
| SVF-C     | 17.1940         | BE37799       | 1.0062                      | 6.053E-15                                            | 5.144E-16                                                              | 3252                                                                                  | 469                                                                                       | 14.4                                   | a2062         | 2292                | 1.268E-14                                             | 1.89E-15                                          | 35241                                                                                 | 5814                                                                                      | 16.5                                   |
| SVF-D     | 25.9510         | BE37800       | 1.0052                      | 9.256E-15                                            | 5.563E-16                                                              | 3843                                                                                  | 330                                                                                       | 8.6                                    | a2063         | 2207                | 1.384E-14                                             | 2.00E-15                                          | 24677                                                                                 | 3907                                                                                      | 15.8                                   |
| SVF-E     | 32.0420         | BE37801       | 1.0055                      | 1.541E-14                                            | 8.724E-16                                                              | 5747                                                                                  | 392                                                                                       | 6.8                                    | a2064         | 2117                | 2.991E-14                                             | 2.56E-15                                          | 42863                                                                                 | 3844                                                                                      | 9.0                                    |
| SVF-F     | 21.7560         | BE37800       | 1.0049                      | 1.468E-14                                            | 7.478E-16                                                              | 7998                                                                                  | 504                                                                                       | 6.3                                    | a2065         | 2157                | 2.430E-14                                             | 2.25E-15                                          | 51918                                                                                 | 5090                                                                                      | 9.8                                    |
| SVF-P     | 9.1140          | BE37803       | 1.0042                      | 6.166E-15                                            | 1.007E-15                                                              | 6292                                                                                  | 1571                                                                                      | 25.0                                   | a2068         | 2183                | 1.002E-14                                             | 1.75E-15                                          | 49105                                                                                 | 9688                                                                                      | 19.7                                   |
| SVF-S     | 36.5640         | BE37804       | 1.0046                      | 4.273E-14                                            | 1.456E-15                                                              | 15262                                                                                 | 556                                                                                       | 3.6                                    | a2069         | 2590                | 5.728E-14                                             | 3.79E-15                                          | 89224                                                                                 | 6042                                                                                      | 6.8                                    |
| HCR-2     | 13.7900         | BE790         | 0.8414                      | 4.689E-15                                            | 4.90E-16                                                               | 4808                                                                                  | 606                                                                                       | 12.6                                   | Al880         | 2415                | 1.290E-14                                             | 2.317E-15                                         | 45312                                                                                 | 9529                                                                                      | 21.0                                   |
| HCR-3     | 11.8968         | BE791         | 0.8396                      | 2.917E-15                                            | 3.61E-16                                                               | 3159                                                                                  | 537                                                                                       | 17.0                                   | Al881         | 2451                | 5.009E-15                                             | 1.446E-15                                         | 17003                                                                                 | 7503                                                                                      | 44.1                                   |
| HCR-6     | 20.8499         | BE792         | 0.8414                      | 1.100E-13                                            | 3.04E-15                                                               | 84838                                                                                 | 2357                                                                                      | 2.8                                    | Al882         | 2518                | 1.673E-13                                             | 6.371E-15                                         | 447446                                                                                | 17290                                                                                     | 3.9                                    |
| HCR-7     | 18.5203         | BE793         | 0.8391                      | 1.922E-14                                            | 9.52E-16                                                               | 16220                                                                                 | 841                                                                                       | 5.2                                    | Al883         | 2425                | 2.726E-14                                             | 2.782E-15                                         | 75815                                                                                 | 8424                                                                                      | 11.1                                   |
| HCR-8     | 21.3362         | BE794         | 0.8388                      | 1.229E-14                                            | 6.92E-16                                                               | 8840                                                                                  | 537                                                                                       | 6.1                                    | Al884         | 2461                | 1.582E-14                                             | 1.919E-15                                         | 37361                                                                                 | 5310                                                                                      | 14.2                                   |
| HCR-10    | 17.1301         | BE796         | 0.8409                      | 4.060E-15                                            | 3.91E-16                                                               | 3275                                                                                  | 399                                                                                       | 12.2                                   | Al886         | 2371                | 7.021E-15                                             | 1.532E-15                                         | 17642                                                                                 | 5278                                                                                      | 29.9                                   |
| HCR-S     | 21.0057         | BE798         | 0.8347                      | 2.476E-14                                            | 1.06E-15                                                               | 18456                                                                                 | 822                                                                                       | 4.5                                    | Al888         | 2475                | 2.702E-14                                             | 4.191E-15                                         | 95423                                                                                 | 10170                                                                                     | 10.7                                   |
| HCR-P     | 18.4683         | BE797         | 0.8401                      | 1.206E-14                                            | 6.99E-16                                                               | 10027                                                                                 | 627                                                                                       | 6.3                                    | Al887         | 1976                | 4.127E-14                                             | 2.352E-15                                         | 67601                                                                                 | 6497                                                                                      | 9.6                                    |
| SCQ-A     | 30.7230         | BE37805       | 1.0056                      | 3.078E-14                                            | 9.986E-16                                                              | 12852                                                                                 | 463                                                                                       | 3.6                                    | a2070         | 1973                | 5.255E-14                                             | 3.486E-15                                         | 74119                                                                                 | 5044                                                                                      | 6.8                                    |
| SCQ-E     | 32.0030         | BE37806       | 1.0052                      | 6.656E-14                                            | 2.423E-15                                                              | 27652                                                                                 | 1044                                                                                      | 3.8                                    | a2071         | 2253                | 9.187E-14                                             | 5.923E-15                                         | 143058                                                                                | 9338                                                                                      | 6.5                                    |
| SCQ-F     | 22.9320         | BE37807       | 1.0043                      | 1.804E-14                                            | 8.650E-16                                                              | 9589                                                                                  | 544                                                                                       | 5.7                                    | a2072         | 1251                | 6.006E-14                                             | 4.045E-15                                         | 72119                                                                                 | 4960                                                                                      | 6.9                                    |
| SCQ-P     | 6.4370          | BE37808       | 1.0064                      | 8.526E-15                                            | 7.436E-16                                                              | 13957                                                                                 | 1696                                                                                      | 12.2                                   | a2074         | 1965                | 1.168E-14                                             | 1.673E-15                                         | 73898                                                                                 | 11862                                                                                     | 16.1                                   |
| SCQ-S     | 37.8470         | BE37809       | 1.0057                      | 7.063E-14                                            | 1.569E-15                                                              | 24868                                                                                 | 577                                                                                       | 2.3                                    | a2075         | 2325                | 7.582E-14                                             | 4.978E-15                                         | 102796                                                                                | 6856                                                                                      | 6.7                                    |
| SLC-A     | 16.3937         | BE726         | 0.8365                      | 2.401E-14                                            | 1.131E-15                                                              | 23546                                                                                 | 1141                                                                                      | 4.8                                    | Al857         | 2231                | 4.249E-14                                             | 2.688E-15                                         | 125635                                                                                | 8191                                                                                      | 6.5                                    |
| SLC-B     | 20.2337         | BE727         | 0.8338                      | 3.203E-14                                            | 1.158E-15                                                              | 25534                                                                                 | 943                                                                                       | 3.7                                    | Al858         | 2437                | 5.629E-14                                             | 3.822E-15                                         | 148287                                                                                | 10290                                                                                     | 6.9                                    |
| SLC-C     | 21.3569         | BE799         | 0.8345                      | 6.319E-14                                            | 1.961E-15                                                              | 46982                                                                                 | 1473                                                                                      | 3.1                                    | Al889         | 2905                | 7.242E-14                                             | 3.867E-15                                         | 216399                                                                                | 11756                                                                                     | 5.4                                    |
| SLC-D     | 19.2653         | BE728         | 0.8477                      | 2.988E-14                                            | 1.412E-15                                                              | 24744                                                                                 | 1195                                                                                      | 4.8                                    | Al859         | 2299                | 5.510E-14                                             | 4.227E-15                                         | 143756                                                                                | 11273                                                                                     | 7.8                                    |
| SLC-I     | 14.8049         | BE729         | 0.8430                      | 2.090E-14                                            | 8.365E-16                                                              | 22196                                                                                 | 919                                                                                       | 4.1                                    | Al860         | 2413                | 3.389E-14                                             | 2.939E-15                                         | 119184                                                                                | 10719                                                                                     | 9.0                                    |
| SLC-J     | 19.8994         | BE732         | 0.8399                      | 3.299E-14                                            | 1.514E-15                                                              | 26258                                                                                 | 1229                                                                                      | 4.7                                    | Al863         | 2505                | 5.557E-14                                             | 3.215E-15                                         | 152940                                                                                | 9051                                                                                      | 5.9                                    |
| SLC-P     | 11.5116         | BE731         | 0.8399                      | 1.179E-14                                            | 6.248E-16                                                              | 15670                                                                                 | 882                                                                                       | 5.6                                    | Al862         | 2390                | 2.733E-14                                             | 4.12E-15                                          | 121401                                                                                | 19118                                                                                     | 15.7                                   |
| SLC-S     | 17.5294         | BE733         | 0.8380                      | 3.769E-14                                            | 1.268E-15                                                              | 34057                                                                                 | 1167                                                                                      | 3.4                                    | Al864         | 2472                | 5.068E-14                                             | 4.111E-15                                         | 155944                                                                                | 12956                                                                                     | 8.3                                    |
| SGC2 E    | 23.8788         | b7751         | 0.6999                      | 8.147E-14                                            | 2.472E-15                                                              | 48821                                                                                 | 1572                                                                                      | 3.2                                    | a1890         | 4621                | 4.921E-14                                             | 2.783E-15                                         | 209791                                                                                | 12173                                                                                     | 5.8                                    |
| SGC2 A    | 23.0499         | b7752         | 0.6966                      | 2.464E-14                                            | 1.152E-15                                                              | 13822                                                                                 | 807                                                                                       | 5.8                                    | a1891         | 2111                | 1.578E-14                                             | 1.555E-15                                         | 30965                                                                                 | 3306                                                                                      | 10.7                                   |
| SGC2 B    | 23.0759         | b7753         | 0.6981                      | 1.091E-14                                            | 7.896E-16                                                              | 5007                                                                                  | 601                                                                                       | 12.0                                   | a1892         | 1974                | 1.375E-14                                             | 1.599E-15                                         | 25052                                                                                 | 3169                                                                                      | 12.7                                   |
| SGC2 C    | 14.8560         | b7755         | 0.6979                      | 5.385E-15                                            | 5.329E-16                                                              | 2255                                                                                  | 729                                                                                       | 32.3                                   | a1894         | 2017                | 7.257E-15                                             | 1.193E-15                                         | 20081                                                                                 | 3859                                                                                      | 19.2                                   |

**Table S2.** Full sample parameters for isochron burial dating samples (continued)

|        |         |         |        |            |           |       |      |      |         |      |           |           |        |       |      |
|--------|---------|---------|--------|------------|-----------|-------|------|------|---------|------|-----------|-----------|--------|-------|------|
| SGC2 G | 19.2320 | b7757   | 0.6971 | 1.562E-14  | 8.928E-16 | 9615  | 787  | 8.2  | a1896   | 2039 | 1.602E-14 | 1.728E-15 | 36412  | 4222  | 11.6 |
| SGC2 S | 22.8815 | b7758   | 0.6958 | 2.706E-14  | 1.353E-15 | 15519 | 935  | 6.0  | a1897   | 2259 | 2.887E-14 | 2.129E-15 | 62246  | 4794  | 7.7  |
| STL-3  | 12.7896 | b7761   | 0.6955 | 9.012E-15  | 7.003E-16 | 7034  | 871  | 12.4 | a1900   | 1983 | 1.525E-14 | 2.225E-15 | 51141  | 7739  | 15.1 |
| STL-6  | 22.7830 | b7765   | 0.6978 | 2.240E-14  | 1.292E-15 | 12664 | 859  | 6.8  | a1904   | 1993 | 2.697E-14 | 2.000E-15 | 51735  | 3930  | 7.6  |
| STL-1  | 13.2606 | b7773   | 0.6979 | 9.486E-15  | 9.542E-16 | 7338  | 1112 | 15.2 | a1912   | 1921 | 1.255E-14 | 1.831E-15 | 39058  | 5966  | 15.3 |
| STL-2  | 21.9948 | b7774   | 0.6978 | 1.317E-14  | 7.645E-16 | 6908  | 549  | 7.9  | a1913   | 1991 | 1.965E-14 | 2.157E-15 | 38750  | 4383  | 11.3 |
| STL-5  | 6.3629  | b7777   | 0.6974 | 1.010E-14  | 6.808E-16 | 16712 | 1714 | 10.3 | a1916   | 2056 | 1.396E-14 | 1.833E-15 | 97261  | 13319 | 13.7 |
| STL-7  | 21.9246 | b7778   | 0.6907 | 3.432E-14  | 1.258E-15 | 21024 | 863  | 4.1  | a1917   | 2055 | 3.120E-14 | 2.452E-15 | 64293  | 5153  | 8.0  |
| STL-8  | 15.6834 | b7779   | 0.7020 | 1.261E-14  | 6.863E-16 | 9215  | 705  | 7.6  | a1918   | 1938 | 1.701E-14 | 2.018E-15 | 45616  | 5602  | 12.3 |
| SI5-F  | 29.5560 | XBE0295 | 0.335  | 6.868E-15  | 5.458E-16 | 3230  | 328  | 10.2 | XAL0050 | 1573 | 7.643E-15 | 1.373E-15 | 7634   | 1783  | 23.4 |
| SI5-M  | 30.1570 | XBE0296 | 0.336  | 1.584E-14  | 8.278E-16 | 8203  | 475  | 5.8  | XAL0051 | 2380 | 8.462E-15 | 1.355E-15 | 12763  | 2616  | 20.5 |
| SI5-N  | 25.7140 | XBE0297 | 0.335  | 1.0372E-14 | 6.390E-16 | 6025  | 436  | 7.2  | XAL0052 | 2708 | 6.489E-15 | 1.185E-15 | 12396  | 3130  | 25.3 |
| SI5-O  | 13.8850 | XBE0298 | 0.335  | 4.631E-15  | 4.110E-16 | 4096  | 538  | 13.1 | XAL0053 | 2757 | 2.645E-15 | 6.235E-16 | 6336   | 3859  | 60.9 |
| SI5-P  | 30.6980 | XBE0299 | 0.336  | 7.237E-15  | 5.937E-16 | 3296  | 340  | 10.3 | XAL0054 | 2414 | 5.601E-15 | 1.120E-15 | 7698   | 2237  | 29.1 |
| SI5-S  | 26.7690 | XBE0300 | 0.337  | 1.563E-14  | 7.803E-16 | 9137  | 507  | 5.5  | XAL0055 | 1968 | 5.625E-15 | 1.063E-15 | 7235   | 2009  | 27.8 |
| SI5-U  | 24.7900 | XBE0301 | 0.337  | 5.116E-15  | 4.895E-16 | 2642  | 354  | 13.4 | XAL0056 | 2505 | 4.029E-15 | 8.793E-16 | 6347   | 2411  | 38.0 |
| SI5-V  | 15.1400 | XBE0302 | 0.336  | 3.039E-15  | 3.231E-16 | 1981  | 405  | 20.4 | XAL0057 | 2751 | 2.669E-15 | 7.134E-16 | 5896   | 3801  | 64.5 |
| SI5-X  | 28.6000 | XBE0303 | 0.335  | 6.438E-15  | 4.628E-16 | 3072  | 291  | 9.5  | XAL0058 | 2607 | 4.994E-15 | 1.090E-15 | 7687   | 2539  | 33.0 |
| OCS-1  | 20.1595 | BE777   | 0.8393 | 3.640E-14  | 2.108E-15 | 28644 | 1687 | 5.9  | AL867   | 2416 | 5.805E-14 | 5.865E-15 | 152272 | 15699 | 10.3 |
| OCS-3  | 21.0735 | BE779   | 0.8413 | 3.200E-14  | 2.683E-15 | 24084 | 2059 | 8.5  | AL869   | 2439 | 6.931E-14 | 7.112E-15 | 176086 | 18377 | 10.4 |
| OCS-6  | 20.1359 | BE781   | 0.8392 | 3.750E-14  | 1.941E-15 | 29571 | 1555 | 5.3  | AL871   | 2401 | 4.511E-14 | 5.141E-15 | 117015 | 13691 | 11.7 |
| OCS-7  | 20.0850 | BE783   | 0.8378 | 3.460E-14  | 1.531E-15 | 27272 | 1228 | 4.5  | AL873   | 2413 | 7.134E-14 | 5.865E-15 | 188258 | 15736 | 8.4  |
| OCS-8  | 18.5889 | BE784   | 0.8399 | 3.890E-14  | 3.141E-15 | 33196 | 2728 | 8.2  | AL874   | 2377 | 7.287E-14 | 5.154E-15 | 204758 | 14722 | 7.2  |
| OCS-9  | 20.3097 | BE785   | 0.8393 | 8.110E-14  | 2.421E-15 | 63933 | 1923 | 3.0  | AL875   | 2404 | 1.123E-13 | 5.840E-15 | 293610 | 15437 | 5.3  |
| OCS-10 | 20.1860 | BE788   | 0.8414 | 2.370E-14  | 1.007E-15 | 18515 | 809  | 4.4  | AL878   | 2410 | 6.012E-14 | 5.233E-15 | 157154 | 13953 | 8.9  |
| OCS-S  | 20.2644 | BE787   | 0.8311 | 5.210E-14  | 2.494E-15 | 40582 | 1966 | 4.8  | AL877   | 2368 | 1.043E-13 | 7.150E-15 | 269108 | 18655 | 6.9  |
| OCS-P  | 16.1230 | BE788   | 0.8354 | 3.140E-14  | 1.526E-15 | 30631 | 1521 | 5.0  | AL876   | 2326 | 6.453E-14 | 7.307E-15 | 204129 | 23538 | 11.5 |
| SGR-3  | 22.4709 | b7760   | 0.6975 | 2.47E-14   | 1.158E-15 | 14400 | 786  | 5.5  | a1899   | 2141 | 4.915E-14 | 2.784E-15 | 103515 | 5940  | 5.7  |
| SGR-1  | 16.6775 | b7770   | 0.6995 | 7.90E-14   | 2.101E-15 | 67799 | 1890 | 2.8  | a1909   | 1991 | 1.525E-14 | 6.151E-15 | 486514 | 16397 | 3.4  |
| SGR-2  | 19.2885 | b7772   | 0.6984 | 6.98E-15   | 6.166E-16 | 3115  | 521  | 16.7 | a1911   | 1690 | 1.673E-13 | 2.234E-15 | 32055  | 4390  | 13.7 |

*a: Samples SGC2 and STL used an in-house produced Be carrier with a Be concentration of 318  $\mu\text{g g}^{-1}$ . Samples SVF and SCQ used an in-house produced Be carrier with a Be concentration of 204  $\mu\text{g g}^{-1}$ . Samples HCR, SLC, and OCS used an in-house produced Be carrier with a Be concentration of 288  $\mu\text{g g}^{-1}$ . Sample SI5 used an in-house Be carrier with a Be concentration of 758  $\mu\text{g g}^{-1}$ .*

*b: Be ratios normalized to standards of Nishiizumi et al., (2007).*

*c: All uncertainties are 1 $\sigma$  confidence level.*

*d:  $^{10}\text{Be}$  concentrations and associated measurement uncertainties for samples were blank corrected using either the batch-specific blank for isochron samples processed in one batch or the average value of multiple blanks if the isochron samples were processed in multiple batches. All blank corrections used blanks measured in the same AMS run as the samples. Average total atoms  $^{10}\text{Be}$  in process blanks (errors are 1  $\sigma$ ): HCR = 9510 +/- 2639, SLC and OCS = 9970 +/- 1180, SI5 = 22489 +/- 2725, SVF and SCQ = 27114 +/- 3906, SGC2 = 46366 +/- 7425, STL and SGR = 43510 +/- 6751*

*e: Propagated uncertainties include 1 $\sigma$  error in AMS measurements, error in the blank, and carrier mass (1%).*

*f: Al ratios normalized to standards of Nishiizumi et al. (2004).*

*g:  $^{26}\text{Al}$  concentrations and associated measurement uncertainties for samples were blank corrected using either the batch-specific blank for isochron samples processed in one batch or the average value of multiple blanks if the isochron samples were processed in multiple batches. All blank corrections used blanks measured in the same AMS run as the samples. Average total atoms  $^{26}\text{Al}$  in process blanks: HCR = 72074 +/- 41618, SLC and OCS = 62722 +/- 11600, SI5 = 72572 +/- 36293, SVF and SCQ = 36414 +/- 21028, SGC2 = 27755 +/- 19627, STL and SGR = 20263 +/- 16269.*

**Table S3.** Sample parameters for the surface exposure dating samples from the Bear Canyon surface

| Sample ID | Cathode Number | Location <sup>a</sup> |           | Elevation above Sea Level (m) | Thickness (cm) | Shielding Factor <sup>b</sup> | Boulder Height (m) | Quartz (g) | Be Carrier <sup>c</sup> (g) | Standard | Measured <sup>10</sup> Be/ <sup>9</sup> Be <sup>d,e</sup> |     |           | <sup>10</sup> Be Concentration (atoms g <sup>-1</sup> SiO <sub>2</sub> ) <sup>f,g</sup> |     |       | Model Age (yrs) <sup>e,h,i</sup> |     |      |
|-----------|----------------|-----------------------|-----------|-------------------------------|----------------|-------------------------------|--------------------|------------|-----------------------------|----------|-----------------------------------------------------------|-----|-----------|-----------------------------------------------------------------------------------------|-----|-------|----------------------------------|-----|------|
|           |                | °N                    | °W        |                               |                |                               |                    |            |                             |          |                                                           |     |           |                                                                                         |     |       |                                  |     |      |
| BCB-1     | BE800          | 34.44493              | -119.1145 | 622                           | 4              | 0.995                         | 1.6                | 2.0931     | 0.8088                      | 07KNSTD  | 4.490E-14                                                 | +/- | 1.729E-15 | 325944                                                                                  | +/- | 13171 | 55332                            | +/- | 3107 |
| BCB-3B    | BE765          | 34.44451              | -119.1143 | 619                           | 3              | 0.976                         | 2.0                | 6.6529     | 0.8407                      | 07KNSTD  | 1.611E-13                                                 | +/- | 4.260E-15 | 387155                                                                                  | +/- | 11007 | 66839                            | +/- | 3219 |
| BCB-5     | BE766          | 34.44271              | -119.1127 | 606                           | 4              | 0.997                         | 2.2                | 7.0463     | 0.8409                      | 07KNSTD  | 1.630E-13                                                 | +/- | 4.310E-15 | 372036                                                                                  | +/- | 10575 | 63953                            | +/- | 3078 |
| BCB-7     | BE767          | 34.44148              | -119.1118 | 604                           | 4              | 0.989                         | 2.4                | 7.5634     | 0.8421                      | 07KNSTD  | 2.731E-13                                                 | +/- | 7.700E-15 | 584101                                                                                  | +/- | 17526 | 102334                           | +/- | 5074 |
| BCB-8     | BE768          | 34.44140              | -119.1118 | 604                           | 7              | 0.996                         | 1.3                | 7.4074     | 0.8387                      | 07KNSTD  | 3.113E-13                                                 | +/- | 8.769E-15 | 676762                                                                                  | +/- | 20282 | 120903                           | +/- | 6020 |
| BCB-9     | BE770          | 34.44353              | -119.1124 | 610                           | 6              | 0.997                         | 1.6                | 8.9269     | 0.8390                      | 07KNSTD  | 1.017E-13                                                 | +/- | 2.933E-15 | 181156                                                                                  | +/- | 5589  | 31245                            | +/- | 1538 |
| BCB-10    | BE771          | 34.44361              | -119.1124 | 612                           | 7              | 0.988                         | 2.6                | 7.5474     | 0.8374                      | 07KNSTD  | 1.072E-13                                                 | +/- | 3.323E-15 | 225948                                                                                  | +/- | 7431  | 39628                            | +/- | 2008 |
| BCB-13    | BE772          | 34.44484              | -119.1135 | 621                           | 3              | 0.998                         | 2.2                | 7.0039     | 0.8391                      | 07KNSTD  | 2.963E-13                                                 | +/- | 7.714E-15 | 681441                                                                                  | +/- | 19062 | 116332                           | +/- | 5640 |
| BCB-14    | BE773          | 34.44470              | -119.1140 | 618                           | 7              | 0.998                         | 3.9                | 6.6030     | 0.8382                      | 07KNSTD  | 1.833E-13                                                 | +/- | 4.833E-15 | 445125                                                                                  | +/- | 12619 | 77672                            | +/- | 3747 |
| BCB-15    | BE774          | 34.44581              | -119.1141 | 627                           | 5              | 0.990                         | 2.0                | 6.1815     | 0.8355                      | 07KNSTD  | 2.835E-13                                                 | +/- | 7.558E-15 | 733279                                                                                  | +/- | 20945 | 127806                           | +/- | 6261 |

*a: Coordinates are in WGS84.*

*b: Calculated using the CRONUS-Earth Geometric Shielding Calculator version 1.1 (available online at: <http://hess.ess.washington.edu/>).*

*c: In-house produced Be carrier has a Be concentration of 288 µg g<sup>-1</sup>.*

*d: AMS measured ratios were normalized to standard 01-5-2 with an assumed <sup>10</sup>Be/<sup>9</sup>Be ratio of 8.558 x 10<sup>-12</sup> (Nishiizumi et al., 2007).*

*e: Uncertainties for all concentrations and ages are 1 σ confidence level.*

*f: <sup>10</sup>Be concentrations and associated measurement uncertainties are blank corrected relative to batch specific process blanks. Total atoms <sup>10</sup>Be in process blanks: BCB-1 = 10701 +/- 3102, all other samples = 12107 +/- 4037.*

*g: Propagated uncertainties include the error in the blank, carrier mass (1%), and sample.*

*h: Age calculated using version 3.0 of the CRONUS-Earth online exposure age calculator (available online at: <https://hess.ess.washington.edu/>).*

*i: Constant (time-invariant) scaling scheme of Lal (1991) and Stone (2000) with a reference production rate of 4.24 +/- 0.16 atoms g<sup>-1</sup> yr<sup>-1</sup> based on Promontory Point (PPT) calibration data from Lifton et al., (2015).*

*All ages assume an erosion rate of 0 mm yr<sup>-1</sup>.*

**Table S4.** Parameters for  $^{10}\text{Be}$  erosion rate samples and inputs to CRONUS calculator

| Catchment | Sample ID | Cathode Number | Latitude (°N) <sup>a</sup> | Longitude (°W) <sup>a</sup> | Elevation (m.a.s.l.) <sup>b</sup> | Quartz Mass (g) | Be Carrier (g) <sup>c</sup> | Measured $^{10}\text{Be}/^9\text{Be}$ <sup>d</sup> | $^{10}\text{Be}$ Concentration (atoms g <sup>-1</sup> SiO <sub>2</sub> ) <sup>e</sup> | Effective Latitude (°N) <sup>i</sup> | Effective Longitude (°W) <sup>i</sup> | Effective Elevation (m) <sup>i</sup> | Av. Topographic Shielding <sup>f</sup> | Erosion rate (mm yr <sup>-1</sup> ) <sup>g</sup> | $^{10}\text{Be}$ Erosional Timescale (years) <sup>h</sup> |
|-----------|-----------|----------------|----------------------------|-----------------------------|-----------------------------------|-----------------|-----------------------------|----------------------------------------------------|---------------------------------------------------------------------------------------|--------------------------------------|---------------------------------------|--------------------------------------|----------------------------------------|--------------------------------------------------|-----------------------------------------------------------|
| 1         | SCT       | BE45101        | 34.46800                   | -119.17200                  | 453                               | 9.14            | 0.3374                      | 1.14E-14 +/- 6.79E-16                              | 17906 +/- 1356                                                                        | 34.4876                              | -119.1615                             | 1121                                 | 0.979                                  | 0.33 +/- 0.04                                    | 2410                                                      |
| 3         | SCS       | BE45099        | 34.44366                   | -119.13450                  | 521                               | 16.58           | 0.3375                      | 1.22E-13 +/- 2.46E-15                              | 123983 +/- 2554                                                                       | 34.4791                              | -119.1232                             | 1224                                 | 0.969                                  | 0.05 +/- 0.01                                    | 16000                                                     |
| 4         | SCB       | BE45100        | 34.44136                   | -119.12214                  | 506                               | 17.49           | 0.3371                      | 2.58E-14 +/- 9.36E-16                              | 23440 +/- 948                                                                         | 34.4610                              | -119.1108                             | 962                                  | 0.963                                  | 0.23 +/- 0.02                                    | 3524                                                      |
| 5         | SCSP      | BE45095        | 34.43133                   | -119.09092                  | 175                               | 17.75           | 0.3375                      | 4.65E-15 +/- 4.22E-16                              | 2724 +/- 474                                                                          | 34.4685                              | -119.0634                             | 1197                                 | 0.968                                  | 2.30 +/- 0.39                                    | 348                                                       |
| 8         | SCP       | BE45096        | 34.41244                   | -118.89864                  | 209                               | 9.74            | 0.3365                      | 4.30E-15 +/- 4.68E-16                              | 4336 +/- 932                                                                          | 34.4382                              | -118.8830                             | 682                                  | 0.967                                  | 1.04 +/- 0.21                                    | 769                                                       |
| 9         | SCH       | BE45097        | 34.41669                   | -118.83309                  | 209                               | 16.94           | 0.3374                      | 6.20E-15 +/- 4.91E-16                              | 4418 +/- 558                                                                          | 34.4683                              | -118.8386                             | 814                                  | 0.975                                  | 1.12 +/- 0.15                                    | 714                                                       |
| 10        | SCM       | BE45098        | 34.42757                   | -118.77036                  | 255                               | 17.40           | 0.3396                      | 5.46E-15 +/- 4.83E-16                              | 3601 +/- 540                                                                          | 34.4391                              | -118.7868                             | 532                                  | 0.963                                  | 1.14 +/- 0.18                                    | 702                                                       |
| 11        | SSCB      | BE45094        | 34.41200                   | -118.97500                  | 270                               | 16.75           | 0.3363                      | 1.15E-14 +/- 7.12E-16                              | 9838 +/- 769                                                                          | 34.4302                              | -118.9893                             | 904                                  | 0.963                                  | 0.52 +/- 0.06                                    | 1572                                                      |
| 13        | SSCO      | BE45093        | 34.37748                   | -119.04046                  | 139                               | 18.10           | 0.3371                      | 1.58E-14 +/- 1.04E-15                              | 13208 +/- 1014                                                                        | 34.4020                              | -119.0366                             | 538                                  | 0.988                                  | 0.31 +/- 0.03                                    | 2548                                                      |
| 14        | SSCM      | BE45092        | 34.40111                   | -119.07000                  | 225                               | 16.20           | 0.3327                      | 5.64E-15 +/- 5.07E-16                              | 3972 +/- 590                                                                          | 34.4161                              | -119.0504                             | 662                                  | 0.980                                  | 1.14 +/- 0.18                                    | 702                                                       |
| 17        | SSCOH     | BE45091        | 34.34894                   | -119.11119                  | 102                               | 18.89           | 0.3363                      | 2.03E-14 +/- 9.24E-16                              | 16706 +/- 865                                                                         | 34.3656                              | -119.1244                             | 230                                  | 0.992                                  | 0.20 +/- 0.02                                    | 3941                                                      |
| 18        | VTW       | BE45090        | 34.33776                   | -119.14217                  | 113                               | 15.92           | 0.3368                      | 1.16E-14 +/- 1.05E-15                              | 10444 +/- 1160                                                                        | 34.3772                              | -119.1476                             | 331                                  | 0.989                                  | 0.35 +/- 0.05                                    | 2292                                                      |
| 19        | VTA       | BE45089        | 34.3176                    | -119.14462                  | 99                                | 18.18           | 0.3352                      | 1.18E-14 +/- 9.66E-16                              | 9287 +/- 934                                                                          | 34.3704                              | -119.1799                             | 350                                  | 0.989                                  | 0.40 +/- 0.05                                    | 2010                                                      |
| 20        | VTPT      | BE45088        | 34.31034                   | -119.15312                  | 90                                | 18.18           | 0.3355                      | 2.32E-14 +/- 1.27E-15                              | 19995 +/- 1210                                                                        | 34.3277                              | -119.1733                             | 250                                  | 0.993                                  | 0.17 +/- 0.02                                    | 4819                                                      |
| 23        | VTHA      | BE45087        | 34.28601                   | -119.25642                  | 63                                | 19.16           | 0.3356                      | 1.00E-14 +/- 7.49E-16                              | 10430 +/- 702                                                                         | 34.3145                              | -119.2483                             | 237                                  | 0.982                                  | 0.33 +/- 0.03                                    | 2454                                                      |
| 24        | VTCL      | BE45084        | 34.34259                   | -119.28571                  | 75                                | 17.57           | 0.3349                      | 9.42E-15 +/- 5.75E-16                              | 7172 +/- 607                                                                          | 34.3703                              | -119.2399                             | 341                                  | 0.986                                  | 0.51 +/- 0.06                                    | 1566                                                      |
| 25        | VTCDA     | BE45085        | 34.35331                   | -119.26002                  | 133                               | 16.86           | 0.3467                      | 1.17E-14 +/- 7.17E-16                              | 10257 +/- 793                                                                         | 34.3700                              | -119.267                              | 275                                  | 0.986                                  | 0.34 +/- 0.04                                    | 2339                                                      |

a: Coordinates are in WGS84

b: m.a.s.l = Meters above sea level.

c: In-house produced Be carrier has a Be concentration of 758  $\mu\text{g g}^{-1}$ .

d: AMS measured ratios were normalized to standard 01-5-2 with an assumed  $^{10}\text{Be}/^9\text{Be}$  ratio of  $8.558 \times 10^{-12}$  (Nishiizumi et al., 2007). All uncertainties are 1 $\sigma$  confidence level.

e:  $^{10}\text{Be}$  concentrations and associated measurement uncertainties are blank corrected relative to the average of the two blanks processed alongside the samples in the laboratory. Total atoms  $^{10}\text{Be}$  in process blanks: Catchments 1-13 = 31126 +/- 4227, catchment 14-25 = 30933 +/- 4391, average value = 31029 +/- 136 atoms. All uncertainties are external uncertainties and are 1 $\sigma$  confidence level.

f: Topographic shielding calculated using algorithms in Mudd et al., (2016).

g: Calculated using the CRONUS online calculator version 3 (available at: <https://hess.ess.washington.edu>; Balco et al., [2008]). Calculations used a density of 2.65 g cm<sup>-3</sup>, thickness of 1 cm, Be standardization 07KNSTD from Nishiizumi et al., (2007), and the constant production rate model of Lal (1991) and Stone (2000).

h: Time required to remove one mean attenuation path length,  $T=z*/e$ , using  $z*=80$  cm (typical for silicate rocks; Yanites et al., 2009) and  $e$ =erosion rate.

i: Latitude, longitude, and elevation that correspond to the hypsometry-weighted production rate for the catchment.

**Table S5.** Well data for wells used in cross section in Figure 6B

| <i>Well ID</i> | <i>API</i> | <i>Lease Name</i>             | <i>Section</i> | <i>Township</i> | <i>Range</i> |
|----------------|------------|-------------------------------|----------------|-----------------|--------------|
| 1              | 11120083   | Dankar-Alpert                 | 35             | 03N             | 30W          |
| 2              | 11105866   | Berywood Investment Company   | 36             | 03N             | 20W          |
| 3              | 11105864   | Johnson                       | 24             | 03N             | 20W          |
| 4              | 11121015   | Glad                          | 18             | 03N             | 19W          |
| 5              | 11100452   | Geis-Robertson                | 12             | 03N             | 20W          |
| 6              | 11106071   | Kenneth H. Hunter-River Ranch | 36             | 04N             | 20W          |

*Well data collected from the California Department of Conservation: Well Finder. Available at: [www.maps.conservation.ca.gov](http://www.maps.conservation.ca.gov) [last accessed: 09/09/2020]*



**Table S6.** Alternative isochron burial ages

| Isochron                                      | Preferred Slope                          | Preferred Intercept ( <sup>26</sup> Al atoms/g) | Preferred Post Burial Production <sup>26</sup> Al Concentration* | Preferred Age (Ma)                       | Alternative Slope                        | Alternative Age (Ma)**                              | Notes                                                                                                                                                                                                                                            |
|-----------------------------------------------|------------------------------------------|-------------------------------------------------|------------------------------------------------------------------|------------------------------------------|------------------------------------------|-----------------------------------------------------|--------------------------------------------------------------------------------------------------------------------------------------------------------------------------------------------------------------------------------------------------|
| Base Las Posas, Ventura (HCR)                 | 5.05 <sup>+0.15</sup> / <sub>-0.13</sub> | 462 <sup>+1402</sup> / <sub>-462</sub>          | 4 % (1 %)                                                        | 0.60 <sup>+0.05</sup> / <sub>-0.06</sub> | 5.19 <sup>+0.42</sup> / <sub>-0.35</sub> | 0.55 <sup>+0.15</sup> / <sub>-0.16</sub>            | Alternative age without the highest concentration sample (HCR-6) overlaps with preferred age when sample HCR-6 is included. Sample HCR-2 (nuclide concentration reset by post-burial production) is also omitted from all ages.                  |
| Top Saugus, Ventura (SVF)                     | 5.66 <sup>+0.62</sup> / <sub>-0.48</sub> | 5996 <sup>+3540</sup> / <sub>-4782</sub>        | 24 % (12 %)                                                      | 0.36 <sup>+0.18</sup> / <sub>-0.22</sub> | 6.66 <sup>+0.07</sup> / <sub>-1.12</sub> | Indistinguishable from the surface production ratio | Alternative slope when sand sample omitted is indistinguishable from the surface production ratio. Samples SVF-B (complex burial history) and SVF-C (nuclide concentration reset by post-burial production) are also omitted from preferred age. |
|                                               |                                          |                                                 |                                                                  |                                          | 5.30 +/- 1.16                            | 0.50 +/- 0.46                                       | Removing just SVF-B                                                                                                                                                                                                                              |
|                                               |                                          |                                                 |                                                                  |                                          | 5.61 +/- 1.54                            | 0.38 <sup>+0.56</sup> / <sub>-0.58</sub>            | Removing just SVF-C                                                                                                                                                                                                                              |
| Base GCDF, Oak Ridge (SGC2)                   | 4.05 <sup>+0.25</sup> / <sub>-0.22</sub> | 4288 <sup>+2878</sup> / <sub>-3255</sub>        | 21 % (7 %)                                                       | 1.06 +/- 0.12                            | NA                                       | NA                                                  | No alternative age.                                                                                                                                                                                                                              |
| Top Saugus, Happy Camp Syncline (SCQ)         | 4.21 <sup>+0.61</sup> / <sub>-0.39</sub> | 24331 <sup>+6231</sup> / <sub>-7945</sub>       | 34 % (27 %)                                                      | 0.98 <sup>+0.20</sup> / <sub>-0.28</sub> | 3.10 +/- 1.42                            | 1.61 <sup>+0.96</sup> / <sub>-0.98</sub>            | Alternative age includes sand sample.                                                                                                                                                                                                            |
| Top Saugus, Long Canyon Syncline (SLC)        | 4.04 <sup>+0.54</sup> / <sub>-0.42</sub> | 37809 <sup>+11634</sup> / <sub>-14868</sub>     | 32 % (25 %)                                                      | 1.06 <sup>+0.23</sup> / <sub>-0.26</sub> | 3.88 <sup>+0.51</sup> / <sub>-0.39</sub> | 1.15 <sup>+0.22</sup> / <sub>-0.26</sub>            | Alternative age includes sand sample. SLC-Peb is also omitted from all ages.                                                                                                                                                                     |
| Base Sunshine Ranch, East Ventura Basin (SI5) | 1.37 <sup>+0.30</sup> / <sub>-0.19</sub> | 2807 <sup>+816</sup> / <sub>-1286</sub>         | 44 % (33 %)                                                      | 3.30 <sup>+0.30</sup> / <sub>-0.41</sub> | 0.38 <sup>+0.62</sup> / <sub>-0.38</sub> | 5.97 <sup>+3.44</sup> / <sub>-3.50</sub>            | Alternative age includes sand sample.                                                                                                                                                                                                            |
| Top Saugus, East Ventura Basin (STL)          | 4.52 <sup>+1.00</sup> / <sub>-0.72</sub> | 4084 <sup>+7182</sup> / <sub>-4084</sub>        | 11 % (7 %)                                                       | 0.83 <sup>+0.36</sup> / <sub>-0.41</sub> | 2.33 +/- 1.66                            | 2.20 <sup>+1.46</sup> / <sub>-1.48</sub>            | Alternative age includes sand sample but excludes sample STL-3 (nuclide concentration reset by post-burial production).                                                                                                                          |
|                                               |                                          |                                                 |                                                                  |                                          | 1.86 <sup>+0.29</sup> / <sub>-0.20</sub> | 2.66 <sup>+0.24</sup> / <sub>-0.30</sub>            | Alternative age includes sand sample but excludes STL-5 and STL-3 (nuclide concentration reset by post-burial production).                                                                                                                       |

Note: NA = Not applicable

\* Percentage of post-burial production relative to the concentration of the lowest <sup>26</sup>Al concentration sample. Percentage in parentheses is post-burial production relative to the mean <sup>26</sup>Al concentration.

\*\* Non-italicized slopes and ages are most likely (modal) values from Bayesian analysis with 95 % confidence limits. Alternative slopes and ages in italics returned no results from a Bayesian analysis and the burial age is estimated using the slope derived from a York regression (York, 1966). Uncertainties for alternative ages and slopes are 2σ.

**Table S7.** Details on process blanks for Be analysis

| <i>Sample</i>                           | <i>Cathode<br/>Number</i> | <i>Be Carrier <sup>b</sup><br/>(g)</i> | <i><sup>10</sup>Be/<sup>9</sup>Be <sup>c,d</sup></i> |     |          | <i><sup>10</sup>Be Atoms <sup>d</sup></i> |     |      |
|-----------------------------------------|---------------------------|----------------------------------------|------------------------------------------------------|-----|----------|-------------------------------------------|-----|------|
| <i>Isochron Burial Samples</i>          |                           |                                        |                                                      |     |          |                                           |     |      |
| B534D                                   | b7754                     | 0.6979                                 | 3.125E-15                                            | +/- | 4.99E-16 | 46366                                     | +/- | 7425 |
| B535E                                   | b7771                     | 0.6999                                 | 2.731E-15                                            | +/- | 4.07E-16 | 40645                                     | +/- | 6075 |
| B595H                                   | BE723                     | 0.8382                                 | 5.560E-16                                            | +/- | 1.31E-16 | 9192                                      | +/- | 2169 |
| B597I                                   | BE736                     | 0.8390                                 | 6.937E-16                                            | +/- | 1.48E-16 | 11184                                     | +/- | 2387 |
| B603A                                   | BE776                     | 0.8410                                 | 1.765E-15                                            | +/- | 3.46E-16 | 28527                                     | +/- | 5602 |
| B605B                                   | BE789                     | 0.8425                                 | 5.875E-16                                            | +/- | 1.63E-16 | 9510                                      | +/- | 2639 |
| SI5 BLK                                 | XBE0294                   | 0.8424                                 | 1.286E-15                                            | +/- | 1.55E-16 | 22489                                     | +/- | 2726 |
| CFG1401                                 | BE37796                   | 1.0061                                 | 1.977E-15                                            | +/- | 2.84E-16 | 27114                                     | +/- | 3906 |
| <i>Catchment-Averaged Erosion Rates</i> |                           |                                        |                                                      |     |          |                                           |     |      |
| BLK110418                               | BE45102                   | 0.3372                                 | 1.827E-15                                            | +/- | 2.59E-16 | 30933                                     | +/- | 4391 |
| BLK160418                               | BE45103                   | 0.3338                                 | 1.820E-15                                            | +/- | 2.47E-16 | 31126                                     | +/- | 4227 |
| <i>Exposure Dating Samples</i>          |                           |                                        |                                                      |     |          |                                           |     |      |
| B602L                                   | BE775                     | 0.8346                                 | 7.501E-16                                            | +/- | 2.50E-16 | 12107                                     | +/- | 4037 |
| B606C                                   | BE802                     | 0.8359                                 | 6.620E-16                                            | +/- | 1.92E-16 | 10701                                     | +/- | 3102 |

*a: bXXX = measured at SUERC; BEXXX and XBEXXXX = measured at ANSTO, BEXXXXX = measured at Lawrence Livermore National Laboratory.*

*b: Sample CFG1401 used an in-house produced Be carrier with a Be concentration of 204 µg g<sup>-1</sup>. Samples B534D and B535E used an in-house produced Be carrier with a Be concentration of 318 µg g<sup>-1</sup>. Samples B595H, B597I, B602L, B603C, B605B, and B606C used an in-house produced Be carrier with a Be concentration of 288 µg g<sup>-1</sup>. Sample SI5 BLK, BLK110418, and BLK160418 used an in-house Be carrier with a Be concentration of 758 µg g<sup>-1</sup>.*

*c: Be ratios normalized to standards of Nishiizumi et al., (2007).*

*d: All uncertainties are 1σ confidence level.*

**Table S8.** Details on process blanks for Al analysis

| <i>Sample</i> | <i>Cathode Number<sup>a</sup></i> | <i>Total Al<br/>(µg)</i> | <i><sup>26</sup>Al/<sup>27</sup>Al<sup>b,c</sup></i> |     |           | <i><sup>26</sup>Al Atoms<sup>c</sup></i> |     |       |
|---------------|-----------------------------------|--------------------------|------------------------------------------------------|-----|-----------|------------------------------------------|-----|-------|
| B534D         | a1893                             | 1972                     | 6.306E-16                                            | +/- | 4.459E-16 | 27755                                    | +/- | 19627 |
| B535E         | a1910                             | 1938                     | 3.065E-16                                            | +/- | 3.065E-16 | 13254                                    | +/- | 13253 |
| B595H         | AL854                             | 2603                     | 1.312E-15                                            | +/- | 5.868E-16 | 76213                                    | +/- | 34095 |
| B597I         | AL865                             | 2436                     | 9.737E-16                                            | +/- | 6.885E-16 | 52948                                    | +/- | 37443 |
| B603A         | AL866                             | 2437                     | 9.271E-16                                            | +/- | 9.271E-16 | 50434                                    | +/- | 50437 |
| B605B         | AL879                             | 2464                     | 1.310E-15                                            | +/- | 7.565E-16 | 72074                                    | +/- | 41618 |
| SI5 BLK       | XAL0049                           | 2675                     | 1.215E-15                                            | +/- | 6.077E-16 | 72572                                    | +/- | 36293 |
| CFG1401       | a2058                             | 1954                     | 8.352E-16                                            | +/- | 4.822E-16 | 36414                                    | +/- | 21028 |

*a: aXXX = measured at SUERC; ALXXX and XALXXXX = measured at ANSTO*

*b: Al ratios normalized to standards that are consistent with values of Nishiizumi et al., (2004). See Supplemental Materials text for more details on standards used at SUERC versus ANSTO.*

*c: All uncertainties are 1σ confidence level.*

**Table S9.** Be details for CRONUS-N samples

| Sample                          | Cathode Number <sup>a</sup> | Quartz (g) | Be Carrier <sup>b</sup> (g) | <sup>10</sup> Be/ <sup>9</sup> Be <sup>c,d</sup> |     |           | <sup>10</sup> Be Atoms <sup>d</sup> |     |      |
|---------------------------------|-----------------------------|------------|-----------------------------|--------------------------------------------------|-----|-----------|-------------------------------------|-----|------|
| Isochron burial dating samples  |                             |            |                             |                                                  |     |           |                                     |     |      |
| B534K                           | b7764                       | 10.1131    | 0.6978                      | 1.384E-13                                        | +/- | 6.054E-15 | 198450                              | +/- | 8911 |
| B535L                           | b7780                       | 10.6100    | 0.6979                      | 1.635E-13                                        | +/- | 2.902E-15 | 224836                              | +/- | 4098 |
| B595B                           | BE717                       | 10.0263    | 0.8399                      | 1.405E-13                                        | +/- | 3.900E-15 | 231210                              | +/- | 6447 |
| B597C                           | BE730                       | 11.1156    | 0.8378                      | 1.755E-13                                        | +/- | 4.591E-15 | 253156                              | +/- | 6652 |
| B603G                           | BE782                       | 11.3741    | 0.8371                      | 1.759E-13                                        | +/- | 5.293E-15 | 247876                              | +/- | 7488 |
| B605H                           | BE795                       | 11.1349    | 0.8370                      | 1.634E-13                                        | +/- | 4.282E-15 | 235153                              | +/- | 6189 |
| Surface exposure dating samples |                             |            |                             |                                                  |     |           |                                     |     |      |
| B602F                           | BE769                       | 11.0196    | 0.8399                      | 1.566E-13                                        | +/- | 6.214E-15 | 228240                              | +/- | 9108 |

*a: bXXX = measured at SUERC; BEXXX = measured at ANSTO*  
*b: Samples B534K and B535L used an in-house produced Be carrier with a Be concentration of 318 μg g<sup>-1</sup>. Samples B595B, B597C, B602F, B603G, and B605H used an in-house produced Be carrier with a Be concentration of 288 μg g<sup>-1</sup>.*  
*c: Be ratios normalized to standards of Nishiizumi et al., (2007).*  
*d: All uncertainties are 1σ confidence level.*

**Table S10.** Al details for CRONUS-N samples

| <i>Sample</i> | <i>Cathode Number<sup>a</sup></i> | <i>Quartz (g)</i> | <i>Total Al (µg)</i> | <i><sup>26</sup>Al/<sup>27</sup>Al<sup>b,c</sup></i> |     |           | <i><sup>26</sup>Al Atoms<sup>c</sup></i> |     |        |
|---------------|-----------------------------------|-------------------|----------------------|------------------------------------------------------|-----|-----------|------------------------------------------|-----|--------|
| B534K         | a1903                             | 10.1131           | 2660                 | 1.673E-13                                            | +/- | 6.167E-15 | 978424                                   | +/- | 36298  |
| B535L         | a1919                             | 10.6100           | 2700                 | 1.848E-13                                            | +/- | 5.676E-15 | 1047861                                  | +/- | 32285  |
| B595B         | AL848                             | 10.0263           | 3488                 | 1.221E-13                                            | +/- | 4.809E-15 | 937850                                   | +/- | 37616  |
| B597C         | AL861                             | 11.1156           | 3867                 | 1.326E-13                                            | +/- | 6.435E-15 | 1022017                                  | +/- | 50250  |
| B603G         | AL872                             | 11.3741           | 4743                 | 1.162E-13                                            | +/- | 1.180E-14 | 1072846                                  | +/- | 110161 |
| B605H         | AL885                             | 11.1349           | 3833                 | 1.470E-13                                            | +/- | 1.084E-14 | 1119323                                  | +/- | 83485  |

*a: aXXX = measured at SUERC; ALXXX = measured at ANSTO*  
*b: Al ratios normalized to standards that are consistent with values of Nishiizumi et al., (2004). See Supplemental Materials text for more details on standards used at SUERC versus ANSTO.*  
*c: All uncertainties are 1σ confidence level.*
